# Polo-Like Kinase 1 Directs Assembly of the HsCyk-4 RhoGAP/Ect2 RhoGEF Complex to Initiate Cleavage Furrow Formation

Benjamin A. Wolfe<sup>1</sup>, Tohru Takaki<sup>2</sup>, Mark Petronczki<sup>2</sup>, Michael Glotzer<sup>1\*</sup>

**1** Department of Molecular Genetics and Cell Biology, The University of Chicago, Chicago, Illinois, United States of America, **2** Cell Division and Aneuploidy Laboratory, Cancer Research UK London Research Institute, Clare Hall Laboratories, Hertfordshire, United Kingdom

## Abstract

To complete cell division with high fidelity, cytokinesis must be coordinated with chromosome segregation. Mammalian Polo-like kinase 1, Plk1, may function as a critical link because it is required for chromosome segregation and establishment of the cleavage plane following anaphase onset. A central spindle-localized pool of the RhoGEF Ect2 promotes activation of the small GTPase RhoA, which drives contractile ring assembly at the equatorial cortex. Here, we have investigated how Plk1 promotes the central spindle recruitment of Ect2. Plk1 phosphorylates the noncatalytic N terminus of the RhoGAP HsCyk-4 at the central spindle, creating a phospho-epitope recognized by the BRCA1 C-terminal (BRCT) repeats of Ect2. Failure to phosphorylate HsCyk-4 blocks Ect2 recruitment to the central spindle and the subsequent induction of furrowing. Microtubules, as well as the microtubule-associated protein (MAP) Prc1, facilitate Plk1 phosphorylation of HsCyk-4. Characterization of a phosphomimetic version of HsCyk-4 indicates that Plk1 promotes Ect2 recruitment through multiple targets. Collectively, our data reveal that formation of the HsCyk-4-Ect2 complex is subject to multiple layers of regulation to ensure that RhoA activation occurs between the segregated sister chromatids during anaphase.

**Citation:** Wolfe BA, Takaki T, Petronczki M, Glotzer M (2009) Polo-Like Kinase 1 Directs Assembly of the HsCyk-4 RhoGAP/Ect2 RhoGEF Complex to Initiate Cleavage Furrow Formation. *PLoS Biol* 7(5): e1000110. doi:10.1371/journal.pbio.1000110

**Academic Editor:** David Pellman, Dana-Farber Cancer Institute, United States of America

**Received:** November 25, 2008; **Accepted:** March 31, 2009; **Published:** May 26, 2009

**Copyright:** © 2009 Wolfe et al. This is an open-access article distributed under the terms of the Creative Commons Attribution License, which permits unrestricted use, distribution, and reproduction in any medium, provided the original author and source are credited.

**Funding:** BAW is supported by postdoctoral fellowship PF-07-115-01 from the American Cancer Society (<http://www.cancer.org/>). Research in the Glotzer laboratory is supported by National Institutes of Health grant RO1 GM074743 (<http://www.nih.gov/>). Research in the Petronczki laboratory is supported by Cancer Research UK (<http://www.cancerresearchuk.org/>). The funders had no role in study design, data collection and analysis, decision to publish, or preparation of the manuscript

**Competing Interests:** The authors have declared that no competing interests exist.

**Abbreviations:** BRCT, BRCA1 C-terminal; CBD, chitin-binding domain; Cdk, cyclin-dependent kinase; CMV, cytomegalovirus; DAPI, 4',6-diamidino-2-phenylindole; DMSO, dimethyl sulfoxide; EGFP, enhanced green fluorescent protein; GFP, green fluorescent protein; GST, glutathione-S-transferase; KA, kinase active; KD, kinase dead; MAP, microtubule-associated protein; Nt, amino terminus; PBD, Polo-box domain; RNAi, ribonucleic acid interference; ROI, region of interest; SDS, sodium dodecyl sulfate; siRNA, small interfering RNA; wt, wild type.

\* E-mail: [mglotzer@uchicago.edu](mailto:mglotzer@uchicago.edu)

## Introduction

Cell division requires crosstalk between various cell cycle regulatory proteins and the actomyosin and microtubule cytoskeletons. The small GTPase RhoA lies at the interface between these cytoskeletal systems, and its activation at the equatorial cortex following chromosome segregation is a critical step in the specification of the division plane [1]. RhoA activation leads to a dramatic reorganization of the actomyosin cytoskeleton underneath the plasma membrane to form a contractile network necessary for cell cleavage. The spatial regulation of RhoA activation is largely dictated by the microtubule cytoskeleton, through the combined action of microtubule asters and a set of inter-polar microtubule bundles termed the central spindle [2]. The central spindle forms between the divided sister chromatids and acts as a signaling hub, integrating positional and temporal cues to facilitate activation of RhoA at the equatorial cortex [3].

The centralspindlin complex, a heterotetramer consisting of the kinesin-like protein Mklp1 (UniProt Q02241) and the RhoGAP HsCyk-4/MgcRacGAP (hereafter referred to as HsCyk-4 [UniProt Q9H0H5]), is required for assembly of the central spindle

[4,5]. In addition to its role in assembly, HsCyk-4 recruits the RhoGEF Ect2 (UniProt Q9H8V3) to the central spindle [6–9]. HsCyk-4 binds directly to the noncatalytic N terminus of Ect2 in a phosphorylation-dependent manner [6], via a region possessing BRCA1 C-terminal (BRCT) repeats. Because the Ect2 N terminus has been proposed to associate with and inhibit the activity of its C-terminal GEF domain [10], HsCyk-4 binding may facilitate both targeting and activation of the exchange factor for RhoA. Consistent with this model, depletion of either Ect2 or HsCyk-4 prevents RhoA-dependent cortical contractility [6–9]. Hence, formation of the Ect2–HsCyk-4 complex represents a critical step in cleavage plane specification, linking positional information from microtubules with cortical actomyosin contractility through RhoA activation. Because elevated Cdk1–cyclin B activity prevents HsCyk-4 and Ect2 binding [6,7], this association is tightly controlled with respect to the cell cycle such that it occurs only during late mitosis.

The mammalian Polo-like kinase Plk1 (UniProt P53350) was shown recently through a complementary series of chemical genetic and small molecule inhibitor-based studies to be an essential activator of RhoA [11–14]. Inhibition of Plk1 prevents

## Author Summary

The plane of cell division in animal cells is determined by the position of the mitotic spindle during early anaphase, but the molecular signaling that leads to proper formation of the division plane is not fully understood. The actin- and myosin-rich contractile ring, which physically divides a cell in two, localizes to the presumptive division plane through the local activation of a molecular switch protein, RhoA. RhoA is activated by Ect2, which binds to the protein complex centralspindlin found on microtubules in the vicinity of the division plane (the midzone microtubules). One critical component of centralspindlin is Cyk-4, a putative negative regulator of RhoA. Here, we have analyzed the mechanisms that are responsible for targeting the RhoA activator Ect2 to the midzone microtubules. We show that Polo-like kinase 1 (Plk1), in part through the microtubule-associated protein Prc1, phosphorylates Cyk-4. Ect2 binds to phosphorylated Cyk-4 and is then able to activate RhoA and induce proper formation of the contractile ring. Our study therefore has elucidated important details of the signaling cascade in animal cells that ensures proper division-plane formation.

Ect2 association with HsCyk-4 and blocks its recruitment to the central spindle [11–14], suggesting that Plk1 might serve as a stimulatory kinase. Consistent with this, Plk1 phosphorylates Ect2 *in vitro*, and this phosphorylation may affect its exchange activity [15].

The functions of Polo-like kinase family members (Plks) are modulated through their subcellular distribution. Plks are recruited to various cellular sites through recognition of a phosphorylated, or primed, substrate [16]. Specifically, a C-terminal Polo-box domain (PBD) binds to a priming phosphorylation site, which serves to localize and locally activate the Plk [17,18]. The PBD of Plk1 interacts with hundreds of mitotic proteins, each with varying affinities, to control different aspects of cell division [19]. PBD binding to the MAP Prc1 (UniProt O43663) is reported to be the primary anchor for Plk1 at the central spindle [20]. However, additional PBD binding sites independent of Prc1 are present to ensure the anaphase concentration of Plk1 at the central spindle [15,19,21,22]. Here, we have examined the mechanism by which Plk1 stimulates association between Ect2 and HsCyk-4 during anaphase to trigger the onset of cytokinesis. Our data indicate that Plk1 has multiple functions in RhoA activation, part of which can be explained through its phosphorylation of HsCyk-4, and that these functions are enhanced through its targeting to the central spindle.

## Results

Chemical genetic and small-molecule-based inhibition of Plk1 kinase activity prevents both Ect2 association with HsCyk-4 and its recruitment to the central spindle [11–14]. Therefore, we sought to understand the mechanism whereby Plk1 regulates formation of this complex. We have shown previously that the Ect2 N terminus (Ect2-BRCT) is sufficient to localize to the central spindle [6]. Using the localization of this fragment as an assay, we tested the possibility that Plk1 may relieve the autoinhibition of Ect2, freeing the N terminus to associate with HsCyk-4. This model predicts that the central spindle localization of Ect2-BRCT would be independent of Plk1 activity. However, the Plk1 inhibitor BI-2536 [23] disrupted Ect2-BRCT localization to the central spindle in 98% of anaphase HeLa cells compared with 8% of DMSO-treated

control cells ( $n = 50$  for each) (Figure 1A), suggesting that relieving Ect2 autoinhibition is not the sole function of Plk1 in controlling HsCyk-4–Ect2 complex formation.

In addition to localizing to the central spindle when expressed in cells, a recombinant form of Ect2-BRCT associates with endogenous HsCyk-4 from mitotic lysates in a phosphorylation-dependent manner [6]. We therefore used this assay to ask if Plk1 activity is required for this association. First, HsCyk-4 association with Ect2-BRCT was analyzed in lysates from HeLa cells synchronously released from a metaphase block. Although only weak association was detected in metaphase, HsCyk-4, as well as its binding partner, Mklp1, were precipitated in abundance when the vast majority of control cells were in anaphase or telophase (Figure 1B). In contrast, BI-2536 potentially inhibited the ability of recombinant Ect2-BRCT to precipitate either HsCyk-4 or Mklp1 (Figure 1B), suggesting that Plk1 regulates complex formation via HsCyk-4. To confirm this result, nocodazole-arrested cells were forced to exit mitosis through application of the Cdk inhibitor purvalanol A. Treatment of prometaphase cells with purvalanol A induces assembly of ectopic cleavage furrows in the absence of chromosome segregation in a manner dependent upon known cytokinesis regulators [24]. Cdk1 inhibition led to a dramatic increase in the amount of HsCyk-4 precipitated by Ect2-BRCT (Figure 1C). Concurrent application of BI-2536 and purvalanol A potentially blocked HsCyk-4 precipitation by Ect2-BRCT and abrogated ectopic cleavage furrowing (Figure 1C) [12].

Dephosphorylation of mitotic lysates prevents HsCyk-4 precipitation by Ect2-BRCT [6]. Hence, we examined whether the BRCT domains of Ect2 act as a bona fide phosphobinding module. Mutation of residues within the BRCT domains of Ect2 analogous to those that coordinate phosphate in BRCA1 and MDC1 [25] abolished precipitation of HsCyk-4 from mitotic lysates (Figure 1D), confirming that Ect2's BRCT domains function as a phosphobinding module akin to those previously analyzed. Consistent with these biochemical findings, mutation of these two conserved phosphopeptide coordinating residues abolished targeting of the Ect2-BRCT domain to the central spindle in anaphase (Figure 1E).

Our previous findings suggested that the N terminus (Nt) of HsCyk-4 could associate with Ect2-BRCT in the absence of other proteins, albeit with relatively low affinity under nonstringent conditions [6]. *In vitro*, Plk1 has the ability to phosphorylate both HsCyk-4-Nt and Ect2-BRCT (Figure 2A and 2B) [15]. Using purified recombinant proteins and more stringent buffer conditions, we tested whether Plk1 phosphorylation of HsCyk-4-Nt or Ect2-BRCT could stimulate association with its respective binding partner. Although Plk1 phosphorylated both proteins to high stoichiometry as evidenced by a gel mobility shift, only phosphorylation of HsCyk-4-Nt enhanced the association with Ect2-BRCT (Figures 2A and S1A).

HsCyk-4-Nt contains seven consensus motifs for Plk1 phosphorylation (E/D-X-S/T- $\Phi$ ) [26]. To determine which site(s) Plk1 phosphorylates, we utilized two complementary *in vitro* approaches. First, truncations of HsCyk-4-Nt fused to glutathione-S-transferase (GST) were used as substrates for Plk1. Of the various truncations tested, Plk1 preferentially phosphorylated the fragment encompassing amino acids 111–188 (Figure 2B). An array of HsCyk-4 N-terminal peptides was used to confirm this result and more precisely define the region of Plk1 phosphorylation. Only peptides containing amino acids 139–174 of HsCyk-4 were strongly phosphorylated by Plk1 (Figures 2C and S2A). Within this region, four putative Plk1 phosphorylation sites (Ser149, Ser157, Ser164, and Ser170) are well conserved across species and are clustered in a region downstream of the coiled-coil domain and

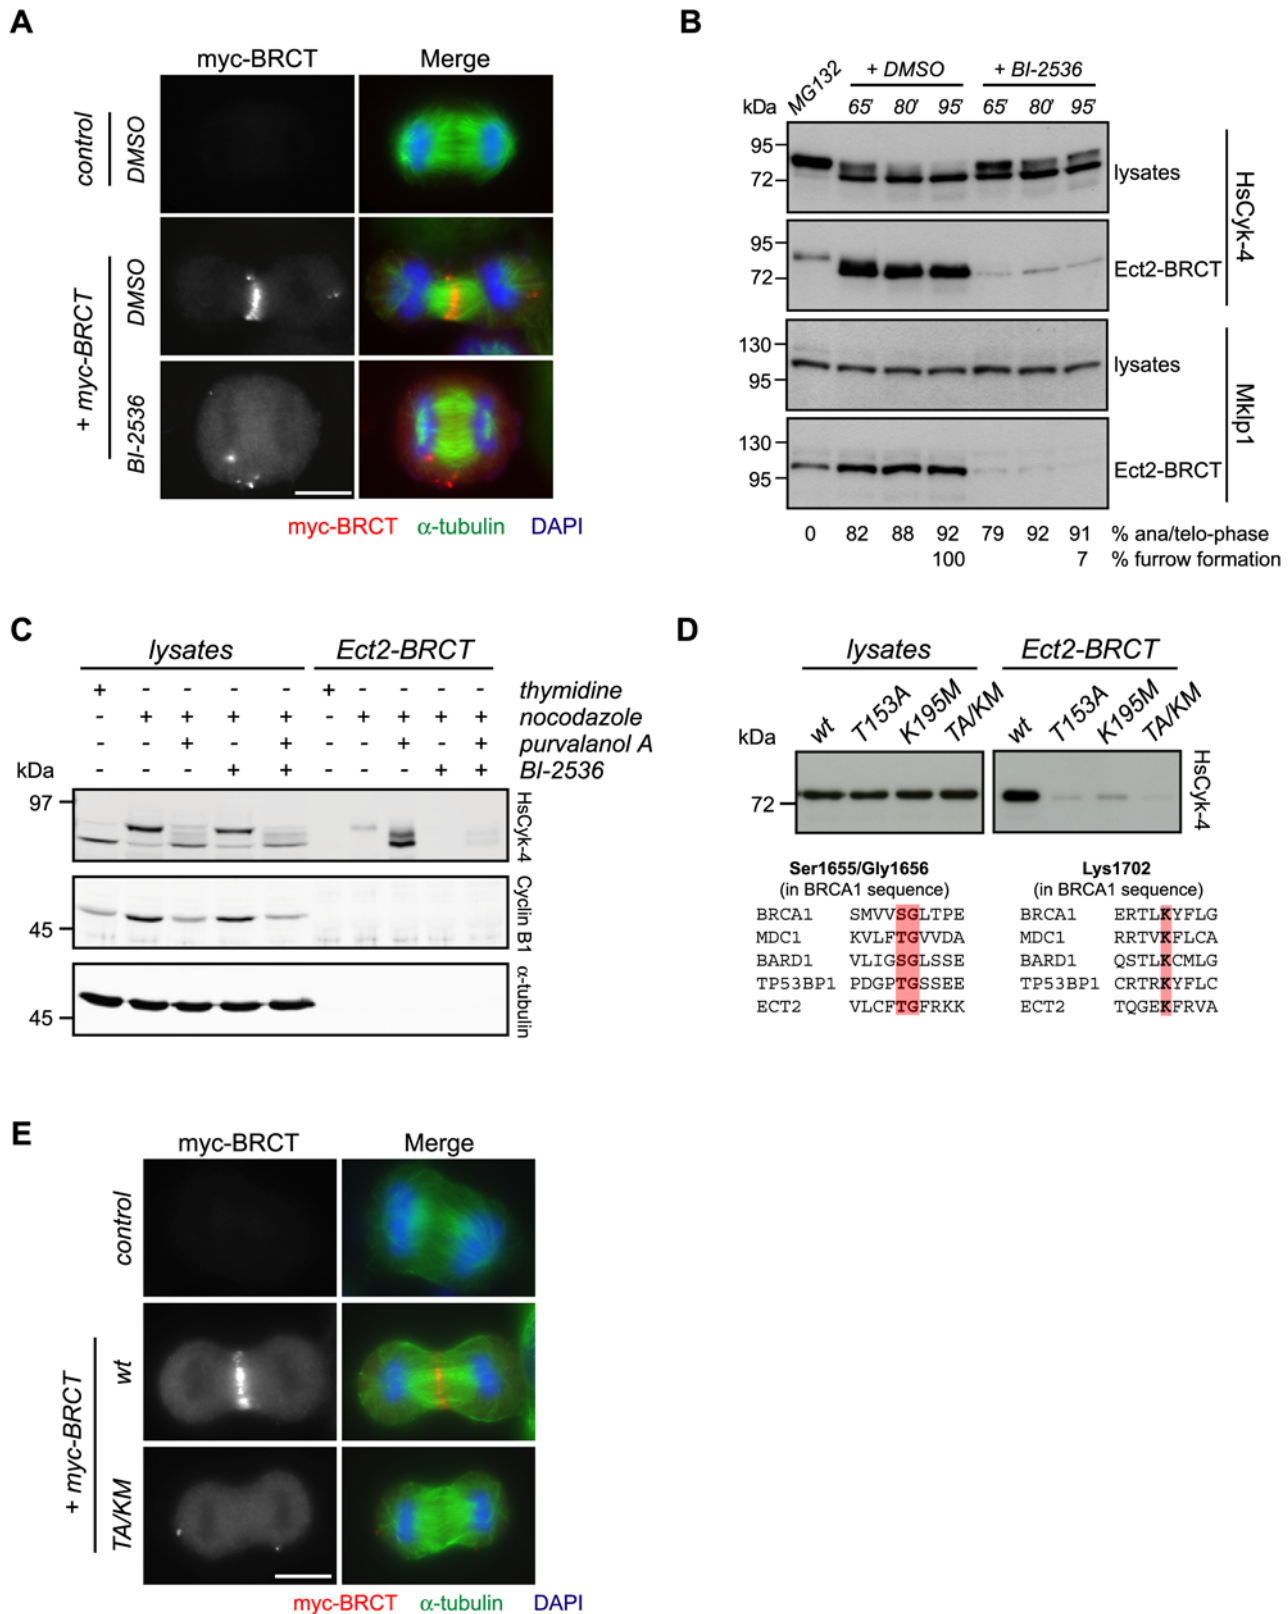

**Figure 1. Inhibition of Plk1 prevents association of HsCyk-4 with Ect2-BRCT.** (A) HeLa cells transfected with H<sub>2</sub>O (control) or CMV-Myc-Ect2-BRCT (myc-BRCT) were synchronized in anaphase using an MG132 arrest/release protocol. Following treatment with 100 nM BI-2536 or DMSO, cells were fixed and stained with antibodies to Myc and  $\alpha$ -tubulin, and DNA was stained with DAPI. (B) HeLa cells, released into anaphase from an MG132 block, were treated with 100 nM BI-2536 or DMSO and harvested at the time points indicated above the lanes. Lysates and Ect2-BRCT-bound fractions were probed with antibodies to HsCyk-4 and Mklp1. The percentages of anaphase and telophase cells and of cells with ingressing furrows are indicated below the corresponding lanes. (C) HeLa cells arrested in prometaphase with nocodazole were treated with DMSO, 22.5  $\mu$ M purvalanol

A, 100 nM BI-2536, or 22.5  $\mu$ M purvalanol A + 100 nM BI-2536 for 30 min. Lysates (~5%) and Ect2-BRCT bound fractions were probed with antibodies to HsCdk-4, cyclin B1, and  $\alpha$ -tubulin. (D) Lysates were prepared from HeLa cells synchronized by nocodazole block, incubated with the indicated immobilized derivatives of Ect2-BRCT, washed, and separated on SDS-PAGE. Lysates (~5%) and Ect2-BRCT bound fractions were probed with antibodies to HsCdk-4 (upper blots). Sequence alignment showing conservation of phosphate coordinating residues in the indicated BRCT-domain containing proteins (lower sequences). (E) HeLa cells were transfected with vector (control), CMV-Myc-Ect2-BRCT (wt), or CMV-Myc-Ect2-BRCT T153A/K195M (TA/KM). Cells were fixed 8 h after release from thymidine, and stained with DAPI and antibodies to Myc and  $\alpha$ -tubulin. Scale bars in this and all other figures represent 10  $\mu$ m.  
doi:10.1371/journal.pbio.1000110.g001

upstream of the C1 domain (Figure 2D). Two of these residues were previously identified in a proteomic screen for phosphorylated mitotic spindle proteins (Ser164 and Ser170) [27]. Mutation of any of these four residues alone was insufficient to prevent Plk1-stimulated binding (Figure S1B). Therefore, these residues were mutated, in combination, to nonphosphorylatable Ala residues and assayed for Plk1-stimulated association with Ect2. In vitro phosphorylation of HsCdk-4-4A (amino acids 111–188) by Plk1 was dramatically reduced, to below 5% of the wild-type fragment (Figure S2B). Importantly, mutation of these four residues effectively disrupted the Plk1-mediated stimulation of HsCdk-4-Ect2-BRCT complex formation (14.9%  $\pm$  8.3% of wild-type association) (Figure 2E). Conversely, mutation of these four serine residues to Asp (HsCdk-4-4D) to mimic the phosphorylated state generated a form of HsCdk-4 capable of associating with Ect2-BRCT even in the absence of Plk1 phosphorylation (Figure 2E). Whereas Plk1 phosphorylation of HsCdk-4-wt stimulated association with Ect2-BRCT 20.2  $\pm$  2.8-fold, HsCdk-4-4A and HsCdk-4-4D produced fold increases of only 3.1  $\pm$  0.9 and 1.7  $\pm$  0.5, respectively, suggesting that the identified residues account for the vast majority of Plk1-mediated stimulation. Yeast two hybrid analysis confirmed that HsCdk-4-4D possessed an increased affinity for Ect2-BRCT (Figure S3). We conclude that Plk1 phosphorylates multiple serine residues in the N terminus of HsCdk-4 in vitro, thereby stimulating its association with Ect2.

To confirm that Plk1 phosphorylates these sites in vivo as well as to determine their spatial and temporal regulation, we obtained phosphospecific antibodies directed at Ser170 in HsCdk-4. Phospho-Ser170 antibodies specifically stained the central spindle of control, but not HsCdk-4-depleted, anaphase cells (Figure 2F). Application of BI-2536 abolished phospho-Ser170 central spindle staining, providing further evidence that Plk1 is the major kinase responsible for generating phosphorylated Ser170 in vivo.

We next tested whether Plk1 phosphorylation of HsCdk-4 is essential for cleavage furrow formation. To address this, we created stable HeLa cell lines expressing RNA interference (RNAi)-resistant derivatives of HsCdk-4 fused to EGFP at its C terminus. Although variability in expression level existed within and between lines (Figure 3A), each line expressed HsCdk-4-EGFP in at least 70% of cells (Figure S4A). All HsCdk-4-EGFP derivatives, despite being expressed above endogenous levels, localized to the central spindle in cells depleted of endogenous HsCdk-4 (Figures 3D, 4A, 4C, S4A, S4B, and S4C), indicating that they retain basic functionality. Additionally, central spindle assembly remained unperturbed as indicated by proper Prcl localization in each of the cell lines (Figure S4B). Phospho-Ser170 antibodies were used to confirm the absence of Plk1 phosphorylation in HsCdk-4-4A-EGFP stable cells (Figure S4C).

We analyzed the ability of the HsCdk-4-EGFP derivatives to rescue the cytokinesis defect associated with depletion of the endogenous protein. Cytokinesis failure was scored both in fixed cell populations (Figure 3B) and by live cell imaging of individual cells (Figure 3C and 3D). In both cases (and all subsequent experiments), cells were transfected with small interfering RNA (siRNA) to deplete endogenous HsCdk-4 for between 28 and 32 h (knockdown = 21.3%  $\pm$  7.4% of endogenous levels, Figure S4D). In

bulk populations, a wild-type copy of HsCdk-4-EGFP was able to largely rescue the cytokinesis failure of endogenous HsCdk-4 depletion (20.7%  $\pm$  1.1% versus 66.7%  $\pm$  1.5% cytokinesis failure), whereas expression of EGFP alone failed to rescue (65.2%  $\pm$  0.2% cytokinesis failure) (Figure 3B). The Plk1 phospho-site mutants differed markedly in their abilities to restore efficient cytokinesis: HsCdk-4-4A-EGFP failed to rescue (59.4%  $\pm$  3.2% cytokinesis failure), whereas HsCdk-4-4D-EGFP rescued to a similar extent as wild type (16.7%  $\pm$  0.7% cytokinesis failure) (Figure 3B). In individual live cells depleted for endogenous HsCdk-4, expression of EGFP alone or HsCdk-4-4A-EGFP failed to restore cleavage furrow formation in 67% ( $n$  = 9) and 47% ( $n$  = 32) of cells, respectively (Figure 3C and 3D). In contrast, 100% of HsCdk-4-wt-EGFP ( $n$  = 15) and HsCdk-4-4D-EGFP ( $n$  = 23) expressing cells formed proper cleavage furrows and successfully completed cytokinesis. Similar results were obtained from cells cotransfected with HsCdk-4 siRNA and HsCdk-4-EGFP-wt/-4A/-4D expression plasmids (Figure S5A). We conclude that phospho-site mutants of HsCdk-4 that fail to associate with Ect2 in vitro block cleavage furrow formation in vivo.

To more fully characterize the cytokinetic defect caused by the nonphosphorylatable allele of HsCdk-4, we examined the localization of critical cytokinetic regulators during anaphase in individual fixed cells. As was the case with all single-cell experiments, only cells expressing the transgenes at comparable levels were scored for phenotypic analysis (Figure S6B and S6D). First, we examined Ect2 localization in cells expressing HsCdk-4-EGFP derivatives. Although Ect2 was recruited to the central spindle by HsCdk-4-wt-EGFP and HsCdk-4-4D-EGFP during anaphase (97.8% and 95.4%, respectively, see Figure S6A for method of assessing localization), a positive Ect2 central spindle signal was not detected in nearly 90% ( $n$  = 96) of anaphase cells expressing HsCdk-4-4A-EGFP (Figures 4A, S6A, and S6B). Similarly, while recombinant Ect2-BRCT precipitated HsCdk-4-wt-EGFP and HsCdk-4-4D-EGFP from purvalanol A-treated cells, Ect2-BRCT failed to precipitate either EGFP alone or detectable amounts of HsCdk-4-4A-EGFP when stably expressed (Figure 4B). To exclude the possibility that the reduced level of HsCdk-4-4A-EGFP expression precluded our ability to detect its association with Ect2-BRCT, we transiently transfected HsCdk-4-EGFP derivatives to approximately equal levels and confirmed the absence of detectable association of HsCdk-4-4A-EGFP with recombinant Ect2-BRCT in purvalanol A-treated cells (Figure S5B). Consistent with its central role in cleavage furrow formation, RhoA localization to the equatorial cortex was perturbed in cells stably expressing HsCdk-4-4A-EGFP (Figure 4C). To quantitatively examine a requirement for Plk1 phosphorylation of HsCdk-4 in RhoA activation, we examined the localization of Anillin, a factor that requires active RhoA signaling for its localization to the equatorial cortex [7,28]. Cortical accumulation of Anillin was disrupted in nearly half of all anaphase cells stably expressing HsCdk-4-4A-EGFP (Figure S6C and S6D). We conclude that Plk1 phosphorylation of the N terminus of HsCdk-4 is necessary to mediate association with Ect2 and promote RhoA activation in vivo. The phenotype associated with HsCdk-4-4A-EGFP expression is highly reminiscent of Plk1 inhibition [11–14], suggesting

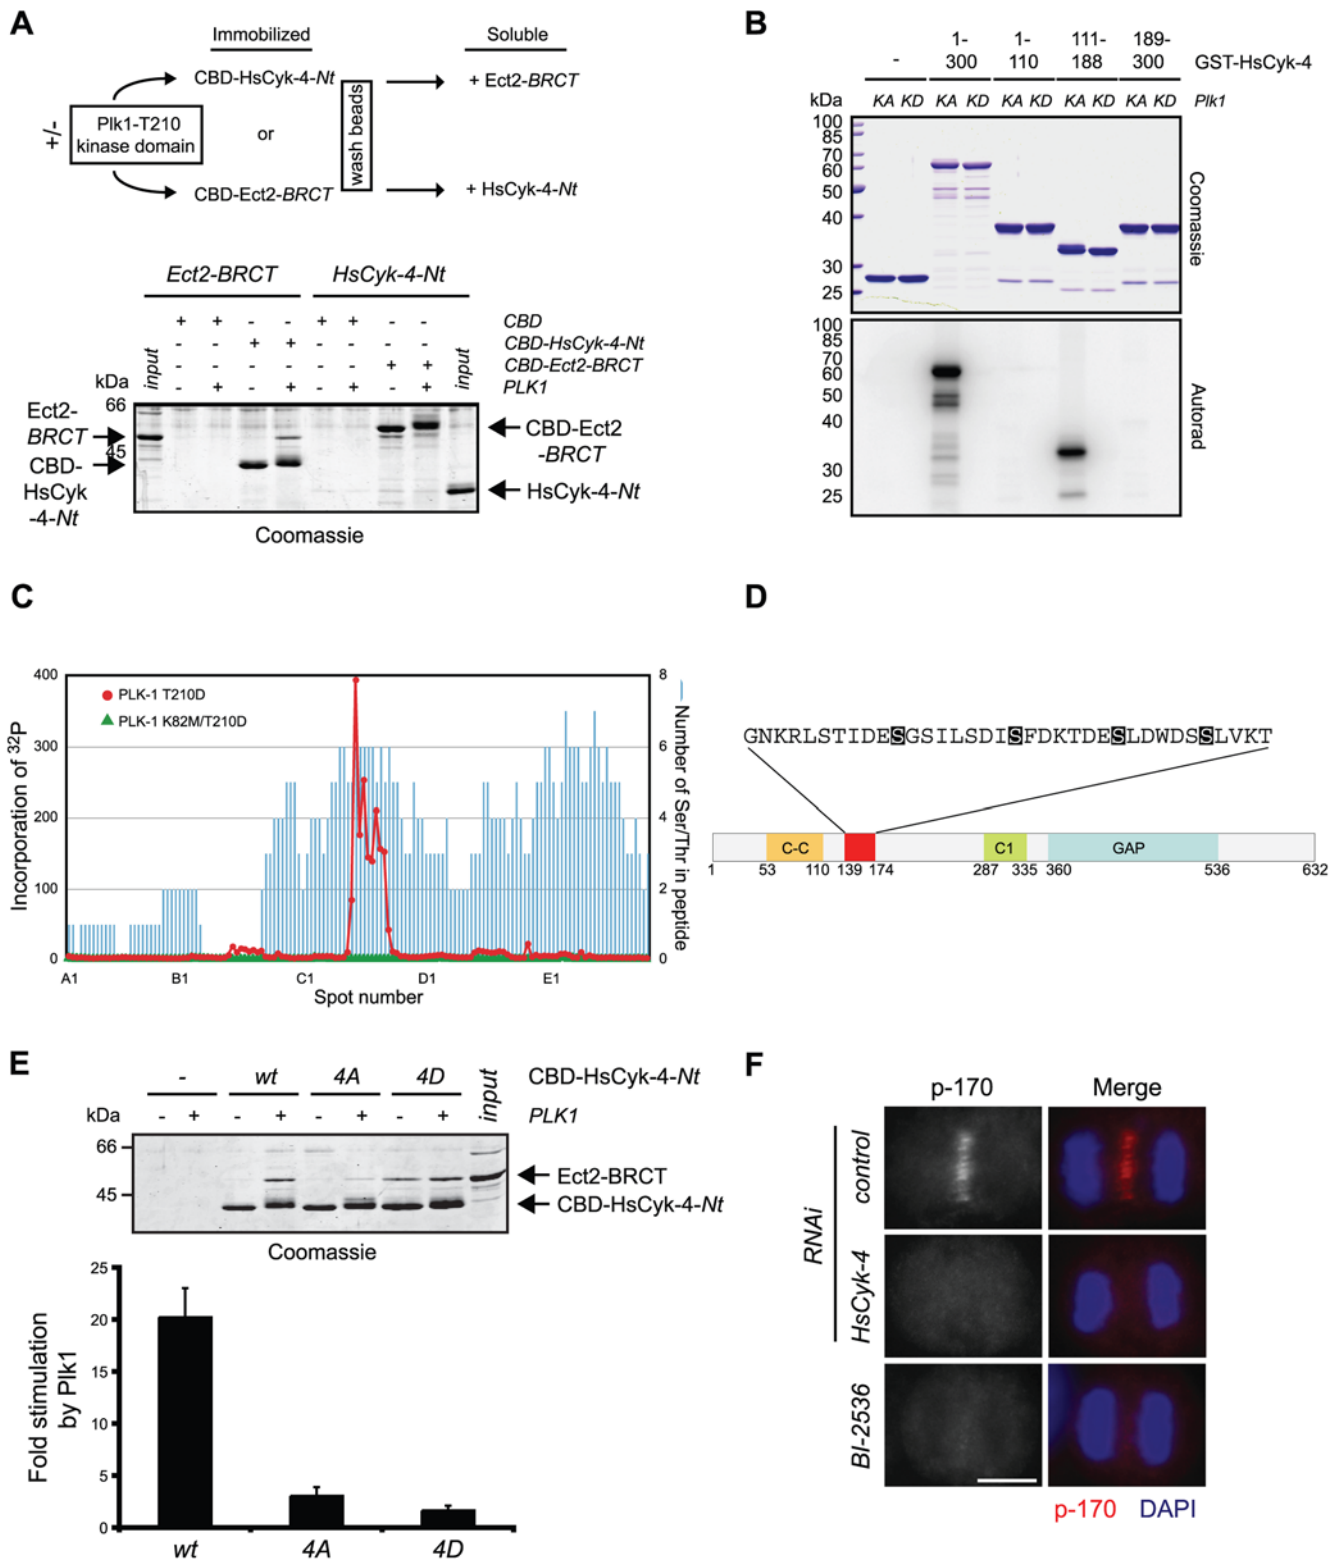

**Figure 2. Plk1 phosphorylates multiple serine residues in HsCyk-4-Nt to stimulate association with Ect2-BRCT.** (A) Schematic of experimental design (upper diagram). Recombinant HsCyk-4-Nt or Ect2-BRCT fused to CBD was incubated in the presence (+) or absence (–) of Plk1-T210D kinase domain and ATP. Soluble HsCyk-4-Nt or Ect2-BRCT was added to the washed beads, mixed, and then separated on SDS-PAGE and Coomassie stained for visualization. Input represents 50% of the total soluble protein incubated with immobilized protein. (B) Immobilized GST and a series of GST-HsCyk-4 truncated proteins as indicated were incubated with full-length recombinant Plk1 T210D (KA) or Plk1 K82M/T210D (KD) and [ $\gamma$ - $^{32}$ P] ATP. Proteins were separated on SDS-PAGE and Coomassie stained for visualization. Incorporation of  $^{32}$ P was visualized by autoradiography. (C) Peptide arrays containing 142 18-mer peptides covering amino acids 1–300 of HsCyk-4 were incubated with recombinant full-length Plk1 T210D or kinase-dead Plk1 K82M/T210D and [ $\gamma$ - $^{32}$ P] ATP. Incorporated  $^{32}$ P was visualized by autoradiography and the intensity at each peptide spot was

quantified and plotted relative to the position of the peptide across the array. (D) Schematic representation of HsCdk-4 functional domains (C-C, coiled-coil domain; C1, C1 domain; GAP, GTPase activating protein domain). The red box indicates the predicted Plk1 target peptide sequence identified from the array analysis (amino acids 139–174). Within this region, Ser149, Ser157, Ser164, and Ser170 are shaded to indicate those residues mutated in the HsCdk-4 derivatives analyzed in (E). (E) Recombinant HsCdk-4-Nt and indicated derivatives fused to CBD were assayed for Plk1 phosphorylation and Ect2-BRCT binding as in (A). Fold stimulation ( $\pm$  standard error of the mean) of Ect2-BRCT binding to HsCdk-4-Nt upon Plk1 phosphorylation was determined from at least three independent experiments (bar graph). (F) HeLa cells transfected with H<sub>2</sub>O (control) or siRNA to deplete endogenous HsCdk-4 were synchronized in anaphase using an MG132 arrest/release protocol. Following treatment with 100 nM BI-2536 or DMSO, cells were fixed and stained with phospho-Ser170 antibodies, and DNA was stained with DAPI.

doi:10.1371/journal.pbio.1000110.g002

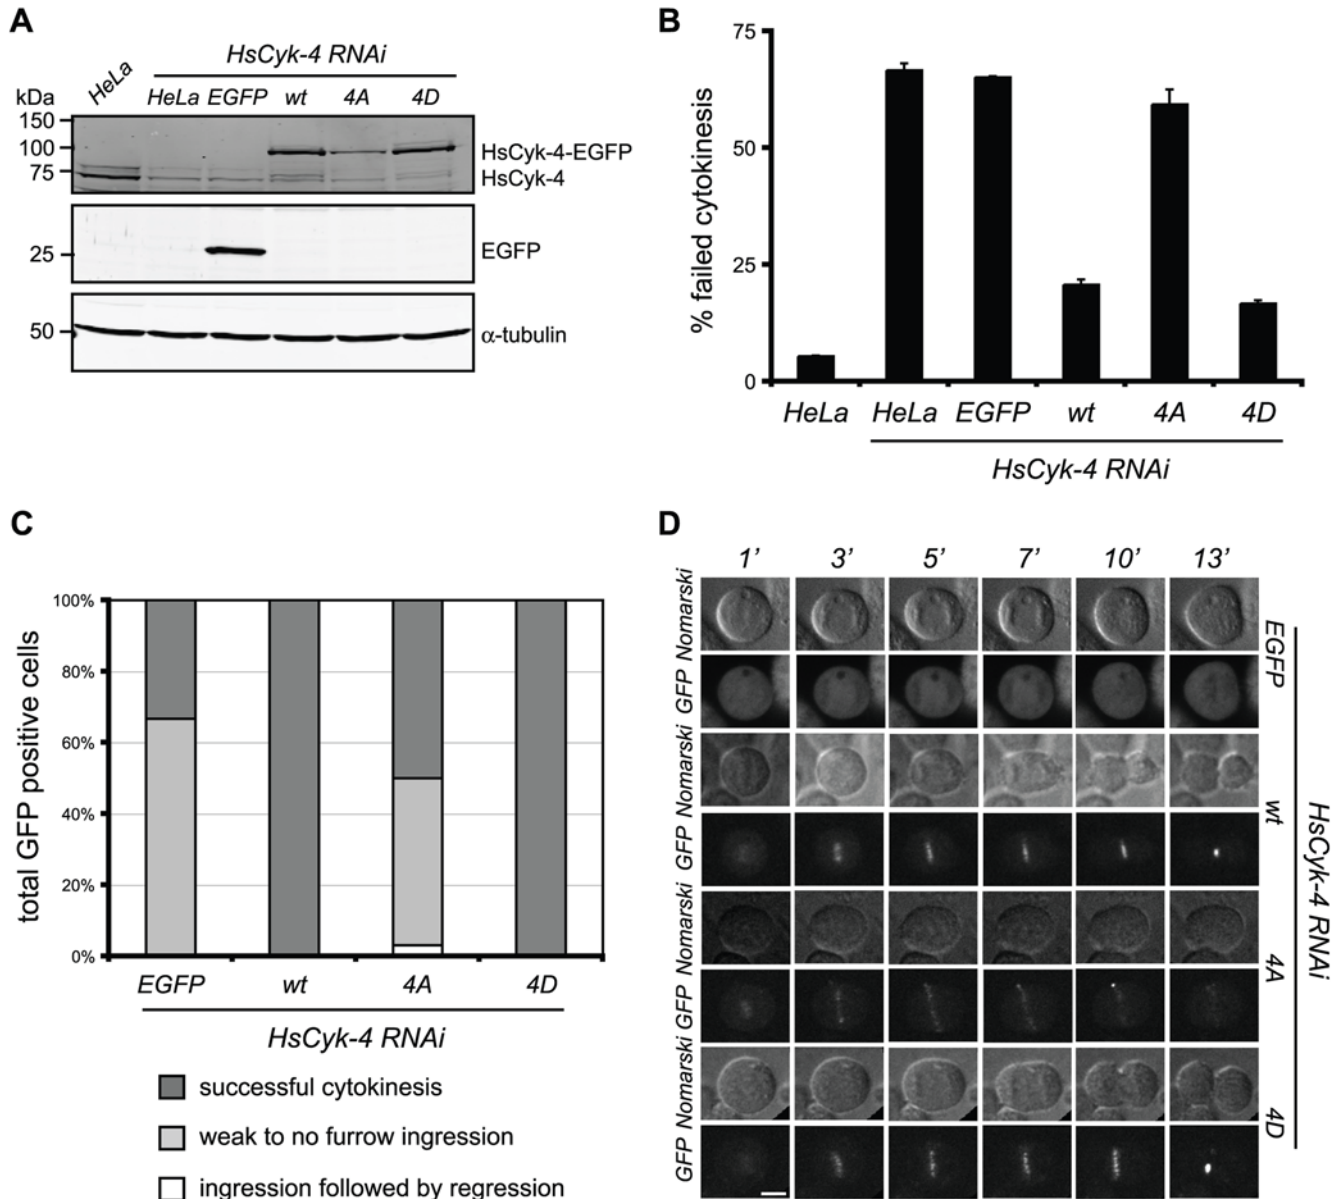

**Figure 3. Plk1 phosphorylation of HsCdk-4 is essential for cleavage furrow formation.** (A) The indicated stable HeLa cell lines and control HeLa cells were transfected with siRNA to deplete endogenous HsCdk-4. At 32 h post-transfection, lysates were prepared, separated on SDS-PAGE, and probed with antibodies to HsCdk-4, GFP, and  $\alpha$ -tubulin. (B) The indicated stable cell lines and control HeLa cells were transfected with siRNA to deplete endogenous HsCdk-4. 32 h post-transfection cells were fixed and stained with GFP and  $\alpha$ -tubulin antibodies, and DNA was stained with DAPI. Failed cytokinesis events were scored from the percentage of bi- or multinucleated GFP-positive interphase cells relative to the total population of GFP-positive cells ( $n \geq 300$ ). Error bars represent standard deviation from two independent experiments. (C) The indicated stable cells transfected with siRNA to deplete endogenous HsCdk-4 were filmed by live video microscopy and scored for the indicated phenotypes. Only those cells expressing HsCdk-4-EGFP with a maximum intensity value above 2,000 over background fluorescence were scored for phenotype. The total number of cells scored for each cell line: EGFP,  $n = 9$ ; wt,  $n = 15$ ; 4A,  $n = 32$ ; 4D,  $n = 23$ . (D) Nomarski and GFP time-lapse images from (C) are shown from early anaphase (1 min post metaphase exit) through late telophase (13 min post metaphase exit) for the indicated stable cell lines. Because of high levels of expression, EGFP stable cells were filmed using reduced exposure times.

doi:10.1371/journal.pbio.1000110.g003

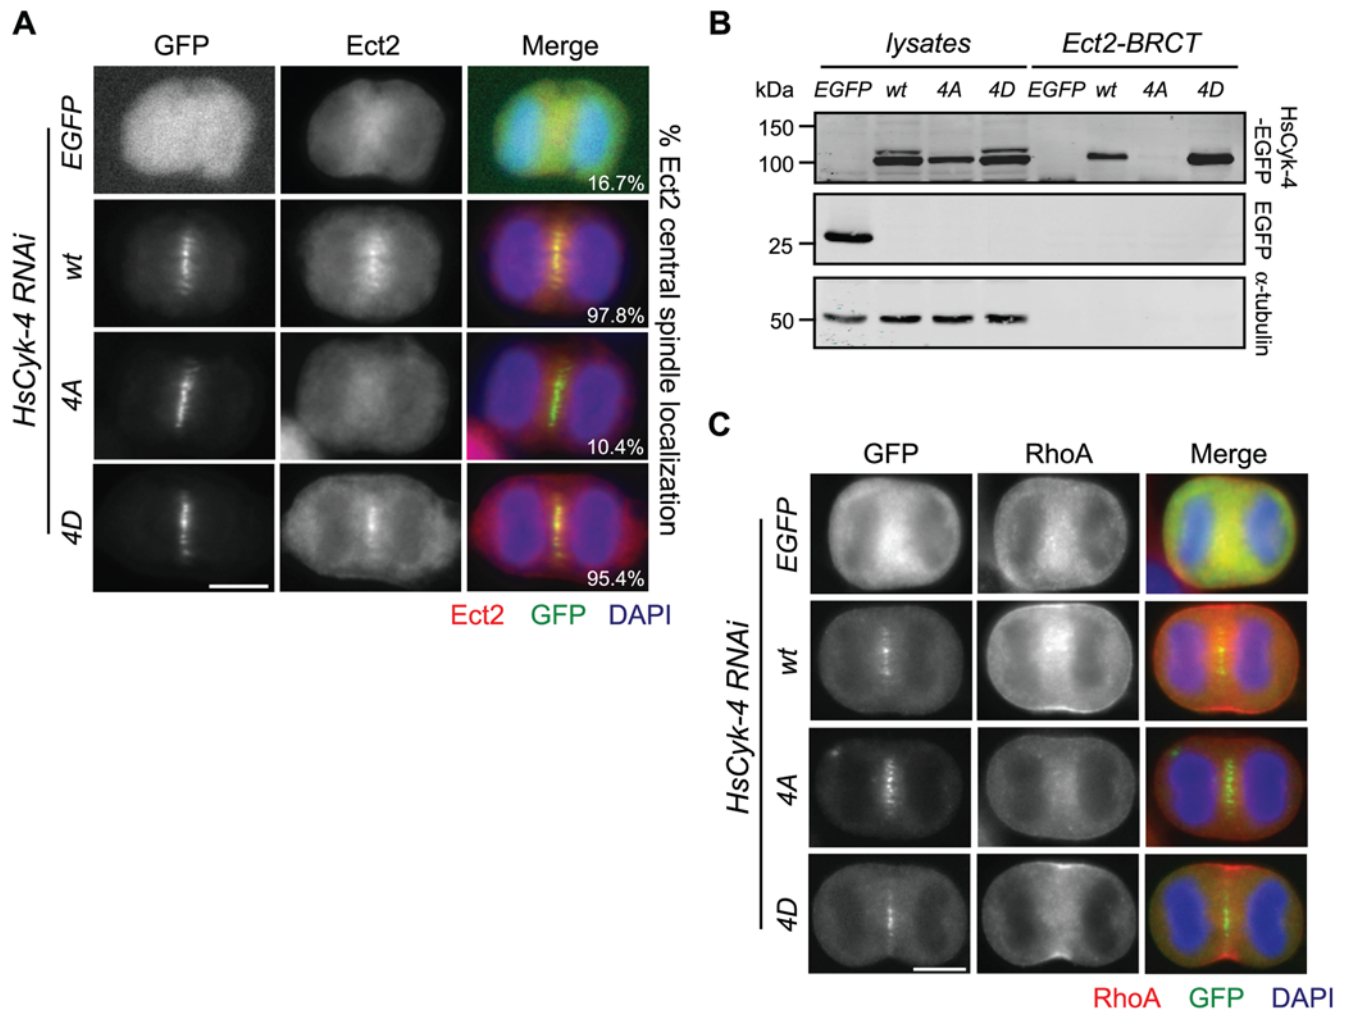

**Figure 4. Phosphorylation of HsCyk-4 is necessary for Ect2 association.** (A) The indicated stable cell lines transfected with siRNA to deplete endogenous HsCyk-4 were fixed and stained with Ect2 and GFP antibodies, and DNA was stained with DAPI. Percentages indicate the fraction of anaphase cells displaying “positive” Ect2 central spindle localization ( $n \geq 90$  cells) as defined in Materials and Methods. (B) The indicated stable cell lines transfected with siRNA to deplete endogenous HsCyk-4 were synchronized with nocodazole, at which point 22.5  $\mu$ M purvalanol A was added to the cells. Lysates and Ect2-BRCT-bound fractions were separated by SDS-PAGE and probed with antibodies to HsCyk-4, GFP, and  $\alpha$ -tubulin. Lysate represents approximately 5% of input. (C) The indicated stable cell lines transfected with siRNA to deplete endogenous HsCyk-4 were fixed and stained with antibodies to RhoA and GFP, and DNA was stained with DAPI. doi:10.1371/journal.pbio.1000110.g004

that, with respect to cleavage furrow formation, HsCyk-4 is a relevant target of Plk1’s kinase activity.

If the primary function of Plk1 in generating the HsCyk-4-Ect2 complex is to phosphorylate HsCyk-4, then HsCyk-4-4D-EGFP should be able to associate with Ect2 in the absence of Plk1 kinase activity. To test this possibility, wild type and HsCyk-4-4D-EGFP stable cells were induced to exit mitosis with addition of purvalanol A in the presence and absence of BI-2536. HsCyk-4-4D-EGFP retained the ability to be precipitated by Ect2-BRCT despite the presence of BI-2536, whereas the association of wild-type HsCyk-4-EGFP with Ect2-BRCT was sensitive to the inhibitor (Figure 5A). Surprisingly, although HsCyk-4-4D-EGFP coprecipitated with Ect2-BRCT in the presence of BI-2536, endogenous Ect2 was not recruited to the central spindle during anaphase of BI-2536 treated HsCyk-4-4D-EGFP cells (Figure 5B, upper images). As a likely consequence, HsCyk-4-4D-EGFP expression did not prevent BI-2536-induced cytokinesis failure (Figure 5B, lower images). These data suggest that Plk1 likely phosphorylates multiple targets essential for cytokinesis, and that the regulated

association between HsCyk-4 and Ect2 at the central spindle requires other Plk1-dependent steps in addition to HsCyk-4 phosphorylation. Because Plk1 is known to phosphorylate the C terminus of Ect2 [15], we asked whether the Ect2-BRCT fragment could localize independently of Plk1 activity in HsCyk-4-4D-EGFP cells. Whereas less than 2% of cells expressing Myc-tagged Ect2-BRCT localized the truncated protein to the central spindle in BI-2536-treated HsCyk-4-wt-EGFP expressing cells, those expressing HsCyk-4-4D-EGFP retained Ect2-BRCT localization in 16.2%  $\pm$  7.1% of BI-2536 treated anaphase cells (Figure 5C). We conclude that while Plk1 phosphorylation of the N terminus of HsCyk-4 is necessary and to a certain extent sufficient to mediate association with Ect2-BRCT, other Plk1-dependent events, occurring at least partially through the C terminus of Ect2, are necessary for its recruitment to the central spindle.

Having established that HsCyk-4 phosphorylation by Plk1 is critical for cleavage furrow formation, we next investigated how this phosphorylation is regulated. Plk1 substrate binding is often

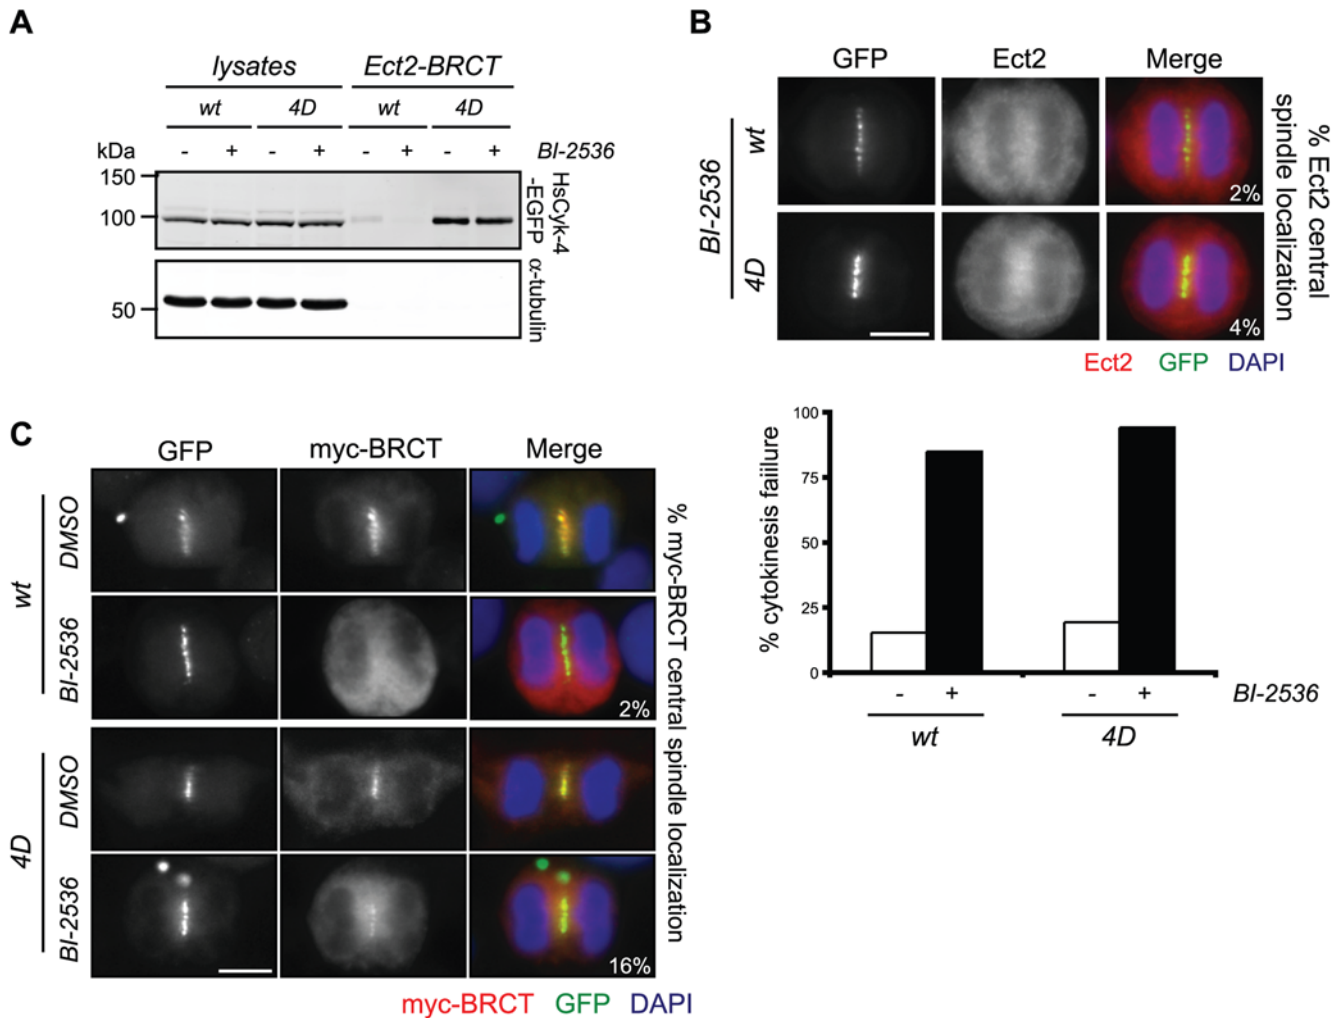

**Figure 5. Plk1 utilizes multiple mechanisms to promote Ect2 central spindle localization.** (A) The indicated stable cell lines transfected with siRNA to deplete endogenous HsCyk-4 were synchronized with nocodazole, at which point 22.5  $\mu$ M purvalanol A was added to the cells in the presence or absence of 100 nM BI-2536. Lysates and Ect2-BRCT-bound fractions were separated by SDS-PAGE and probed with antibodies to HsCyk-4 and  $\alpha$ -tubulin. Lysate represents approximately 5% of input. (B) The indicated stable cell lines were transfected with siRNA to deplete endogenous HsCyk-4 and synchronized in anaphase using an MG132 arrest/release protocol. Following treatment with 100 nM BI-2536, cells were fixed and stained with GFP and Ect2 antibodies, and DNA was stained with DAPI (upper images). Percentages indicate the fraction of anaphase cells displaying positive central spindle accumulation of Ect2 ( $n \geq 50$  cells). The indicated stable cell lines transfected with siRNA to deplete endogenous HsCyk-4 were synchronized using an MG132 arrest/release protocol (lower bar graph). Following treatment with DMSO (-) or 100 nM BI-2536 (+) for 12–16 h, cells were fixed and stained with antibodies to GFP and  $\alpha$ -tubulin, and DNA was stained with DAPI. Failed cytokinesis events were scored from the percentage of bi- or multinucleated GFP-positive interphase cells relative to the total GFP-positive population ( $n \geq 100$ ). (C) The indicated stable cell lines cotransfected with CMV-Myc-Ect2-BRCT (myc-BRCT) and siRNA to deplete endogenous HsCyk-4 were synchronized in anaphase using an MG132 arrest/release protocol. Following treatment with 100 nM BI-2536 or DMSO, cells were fixed and stained with antibodies to Myc and  $\alpha$ -tubulin, and DNA was stained with DAPI. Percentages indicate the fraction of anaphase cells displaying proper Ect2-BRCT central spindle localization ( $n \geq 50$  cells). doi:10.1371/journal.pbio.1000110.g005

mediated through binding of the PBD to a phosphorylation site on the target protein. However, we did not find appreciable amounts of HsCyk-4 associated with either endogenous Plk1 or with recombinant PBD during forced mitotic exit (Figure S7A and S7B), a time when HsCyk-4 serves as a substrate for Plk1. In contrast, the MAP Prc1 associated with endogenous Plk1 as well as recombinant PBD during forced mitotic exit (Figure S6A and S6B) and, together with Mkp2, promotes Plk1 recruitment to central spindle microtubules during anaphase [20,21]. In addition, Prc1 colocalizes with centralspindlin and direct association with HsCyk-4 has been reported [29–31], raising the possibility that it might serve as an intermediary in the phosphorylation of HsCyk-4. Because Ect2-BRCT precipitates HsCyk-4 in lysates from

purvalanol A-treated cells, a reaction requiring Plk1 activity (Figure 1C), we were able to ask whether Prc1 was required for efficient Ect2-BRCT precipitation of HsCyk-4. The amount of HsCyk-4 precipitated in Prc1-depleted cells (knock-down =  $21.5\% \pm 5.0\%$  of endogenous Prc1 levels) was significantly decreased relative to control cells (Figure 6A). The inability of Prc1-depleted cells to generate phosphorylated HsCyk-4 provided a molecular explanation for the failure of HsCyk-4 to associate with Ect2-BRCT (Figure 6B). Consistent with the interpretation that Prc1 functions by facilitating the phosphorylation of HsCyk-4 by Plk1, expression of HsCyk-4-4D-EGFP bypassed the requirement for Prc1 to permit HsCyk-4 precipitation by Ect2-BRCT (Figure 6C).



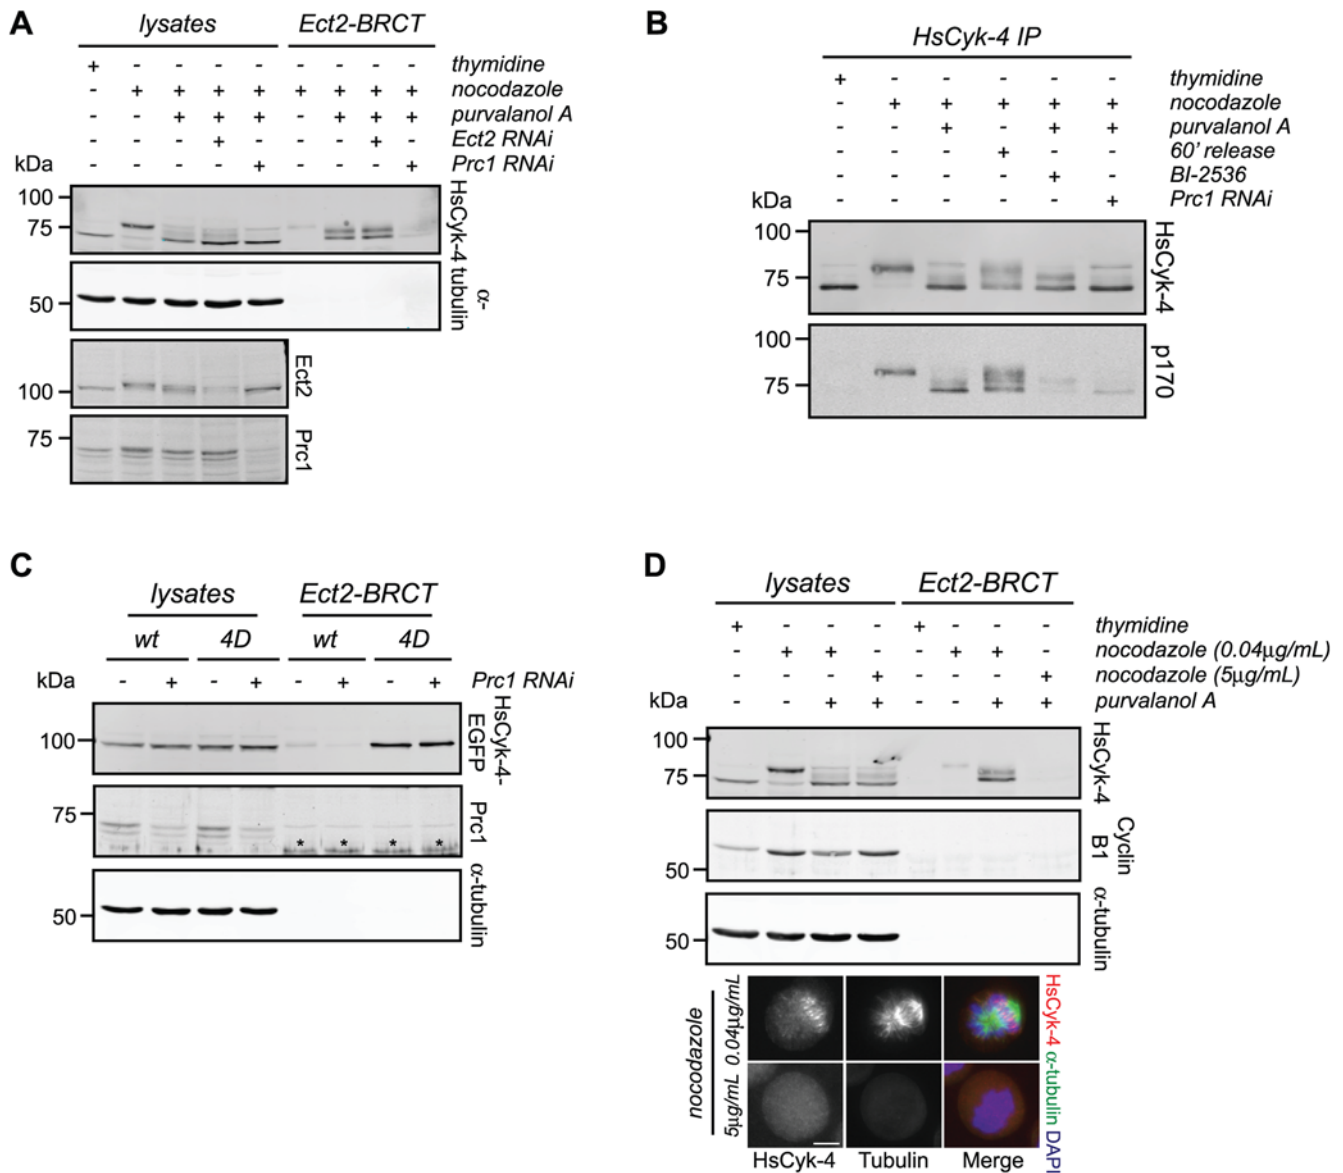

**Figure 6. Prc1 is required for Plk1-mediated stimulation of the HsCyk-4-Ect2 complex.** (A) Control HeLa cells, or those transfected with siRNA to deplete endogenous Ect2 and Prc1, were synchronized in S-phase with thymidine or in prometaphase with nocodazole. Cells were treated with DMSO or 22.5 μM purvalanol A. Lysates and Ect2-BRCT-bound fractions were separated on SDS-PAGE and probed with antibodies to HsCyk-4, α-tubulin, Ect2, and Prc1. Lysate represents approximately 5% of input. (B) HeLa cells were either mock transfected or transfected with siRNA to deplete Prc1, and synchronized in prometaphase with nocodazole. Cells were released from the prometaphase block by either addition of 22.5 μM purvalanol A or replacement with fresh medium and harvested 60 min post-release. Lysates and HsCyk-4 immunoprecipitates were separated on SDS-PAGE. Blots were probed with antibodies to HsCyk-4 and phospho-Ser170. (C) The indicated stable cell lines transfected with siRNA to deplete endogenous HsCyk-4 and Prc1, as indicated, were synchronized in prometaphase with nocodazole, at which point cells were treated with 22.5 μM purvalanol A. Lysates and Ect2-BRCT-bound fractions were separated on SDS-PAGE and probed with antibodies to HsCyk-4, Prc1, and α-tubulin. Lysate represents approximately 5% of input. Asterisks indicate the position of cross-reacting species in recombinant CBD-Ect2-BRCT recognized by Prc1 antibodies. (D) HeLa cells were synchronized with 0.04 μg/ml nocodazole, at which point either DMSO or nocodazole was added to a final concentration of 5 μg/ml in the presence of 22.5 μM purvalanol A. Lysates and Ect2-BRCT-bound fractions were separated on SDS-PAGE and probed with antibodies to HsCyk-4, cyclin B1, and α-tubulin (upper gels). Lysate represents approximately 5% of input. HeLa cells, synchronized and treated as above, were fixed and stained with antibodies to HsCyk-4 and α-tubulin, and DNA was stained with DAPI (lower images). doi:10.1371/journal.pbio.1000110.g006

A direct association between Prc1 and HsCyk-4 may functionally link Plk1 kinase activity with the N terminus of HsCyk-4. To test this possibility, a mutant of Prc1 (Prc1-ST601/2AA) incapable of Plk1 recruitment to the central spindle was expressed in cells depleted for endogenous Prc1 [20]. As previously reported, Prc1-ST601/2AA did not detectably interact with Plk1 (Figure S8B). Despite the disruption in

Plk1–Prc1 association, Plk1 central spindle localization was only moderately attenuated (Figure S8A), and phosphorylated HsCyk-4 on Ser170 persisted at the central spindle (Figure S8C). Although this reduced level of Plk1 at the central spindle could suffice for HsCyk-4 phosphorylation, these data suggest that Plk1 need not associate directly with Prc1 in order to phosphorylate HsCyk-4.

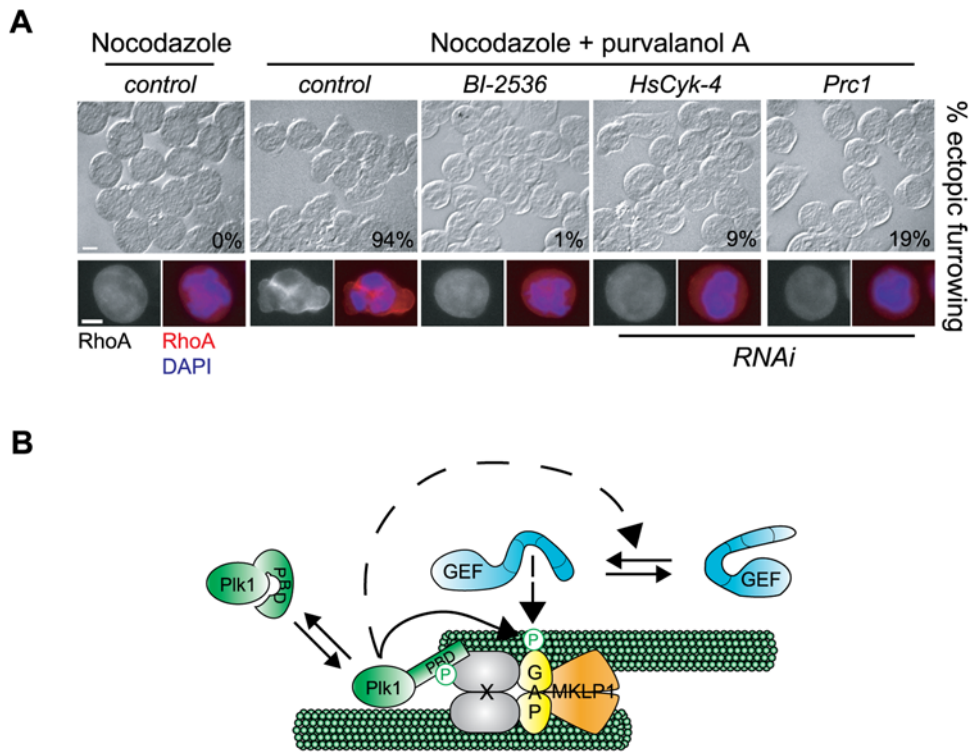

**Figure 7. Ectopic cleavage furrowing during forced mitotic exit requires Prc1.** (A) HeLa cells were either mock transfected (control) or transfected with siRNA to deplete the indicated protein and synchronized in prometaphase with nocodazole. Ectopic cleavage furrow formation and RhoA activation were induced with addition of 22.5  $\mu$ M purvalanol A for 30 min. Cells were fixed and stained with antibodies to RhoA, and DNA was stained with DAPI. Percentages of cells undergoing ectopic cleavage furrow formation were determined as a function of RhoA cortical recruitment in 100 cells. (B) Proposed model. At the central spindle, microtubules are bundled through the combined efforts of the centralspindlin complex and the MAP Prc1. Factor X, which could be Prc1, Mklp2, centralspindlin, or an unknown factor, recruits Plk1 to the central spindle through association with its PBD, freeing the kinase domain to phosphorylate substrates at the central spindle (e.g., HsCdk-4, Ect2). Plk1 phosphorylation of HsCdk-4 is not sufficient for Ect2 recruitment to the central spindle, but requires other Plk1-dependent processes, at least one of which may be the relief of Ect2 autoinhibition. GAP, HsCdk-4; GEF, Ect2.  
doi:10.1371/journal.pbio.1000110.g007

Alternatively, as Prc1, Plk1, and centralspindlin all concentrate on a microtubule-based scaffold, Prc1-mediated bundling of microtubules may facilitate phosphorylation of HsCdk-4 by Plk1. To test this possibility, we asked whether microtubule disruption would influence the ability of Ect2-BRCT to precipitate endogenous HsCdk-4. Low-dose nocodazole treatment (0.04  $\mu$ g/ml), which only weakly disrupted the microtubule cytoskeleton and retained HsCdk-4 microtubule association, permitted robust precipitation of HsCdk-4 by Ect2-BRCT upon purvalanol A addition (Figure 6D). However, 5  $\mu$ g/ml nocodazole caused full microtubule destabilization, delocalized HsCdk-4, and rendered HsCdk-4 association with Ect2-BRCT undetectable (Figure 6D), underscoring the importance of a microtubule platform for this association.

Although these data implicate both Prc1 and a microtubule scaffold as critical regulators of RhoA activation by modulating Plk1 phosphorylation of HsCdk-4, cells depleted for Prc1 can form ingressing cleavage furrows [30,32] and those depleted of microtubules retain contractility [33], indicating that Prc1 and microtubules are not strictly essential for RhoA activation upon mitotic exit. Both prometaphase cells and cells containing monopolar spindles that are forced out of mitosis have more stringent requirements for the formation of cleavage furrows [24,34], suggesting that the process is less robust under these circumstances. We therefore induced prometaphase cells to exit mitosis with purvalanol A and asked whether Prc1 was required

for cortical RhoA localization and ectopic cleavage furrow formation. Indeed, in this context, Prc1 depletion severely compromised RhoA-induced contractility (Figure 7A). We conclude that Prc1 facilitates Plk1 phosphorylation of HsCdk-4 to allow recruitment of Ect2 to the central spindle where it can stimulate the local activation of RhoA. These data suggest that other mechanisms can compensate for the absence of Prc1 during bipolar cytokinesis.

## Discussion

The central spindle serves as a platform for the coordinated recruitment of numerous signaling proteins that regulate cytokinesis [35]. The Plk1-mediated recruitment of the RhoGEF Ect2 to the central spindle by the RhoGAP HsCdk-4 component of centralspindlin appears to be a critical step in the generation of a localized band of cortical RhoA to a region just overlying the central spindle [11–14]. Here, we provide a molecular mechanism whereby the HsCdk-4-Ect2 complex is formed at the central spindle following anaphase onset. By combining a reconstituted system with cell-based analyses, we have demonstrated that Plk1 promotes the phosphorylation of the N terminus of HsCdk-4, thus generating a phospho-epitope recognized by the BRCT domains of Ect2. BRCT binding may relieve Ect2 autoinhibition and facilitate activation of its intrinsic exchange activity toward RhoA. Indeed, stimulation of the HsCdk-4-Ect2 complex formation by

Plk1 phosphorylation is critical for RhoA cortical localization and cleavage furrow formation. Our data also demonstrate that the role of Plk1 in stimulating HsCdk4–Ect2 association is not limited to phosphorylation of HsCdk4, but rather may also involve relief of Ect2 autoinhibition. Furthermore, we have identified the microtubule-associated protein (MAP) Prc1 and microtubules as critical factors facilitating Plk1 phosphorylation of HsCdk4. Collectively, our work has elucidated a molecular basis for Plk1-regulated cleavage furrow formation and has provided further evidence that central spindle microtubules act as a crucial signaling center for cytokinesis (Figure 7B).

In order to stimulate association with the BRCT domains of Ect2, Plk1 targets multiple serine residues within the N terminus of HsCdk4. While BRCT–phosphopeptide interactions have only been modeled with a single phosphorylated residue [36], it is possible that the tandem BRCT domains of Ect2 contact multiple phosphorylated residues. However, because mutation of the equivalent residues in Ect2 that coordinate the phosphate in MDC1 and BRCA1 [25] abrogates binding to HsCdk4, we do not favor this possibility. Alternatively, phosphorylation of multiple residues within HsCdk4 may lead to a conformational change that favors recognition of one particular phosphoserine by the BRCT domains of Ect2. Consistent with this, mutation of Ser157 alone within HsCdk4 abolished association with Ect2-BRCT in mitotic lysates (unpublished data). Still, as mutation of any one of the serine residues was insufficient to prevent Plk1 stimulation of the HsCdk4–Ect2 association *in vitro*, these data are not in complete accordance with one another. Instead, the most plausible explanation of these results is that each of the four phosphoserine residues within the cluster contributes to the overall binding affinity, perhaps by facilitating rebinding upon dissociation.

We have shown that the BRCT repeats of Ect2 can bind a phosphomimetic allele of HsCdk4 (4D) from Plk1-inhibited mitotic lysates, suggesting a rather simple pathway for regulation of HsCdk4 by Plk1. However, despite premature Ect2 association with HsCdk4-4D in early mitotic cells (unpublished data), RhoA-induced cortical contractility was not observed. These data suggest that further steps are necessary to form a complex competent for triggering contractile events. One such step may be the removal of inhibitory Cdk1–cyclin B phosphorylations [6,7]. Additionally, Plk1 phosphorylation of HsCdk4 is necessary, but not sufficient, for Ect2 central spindle recruitment. As appreciable central spindle localization of isolated BRCT domains can occur in Plk1-inhibited cells expressing phosphomimetic HsCdk4, Plk1 may also function to relieve Ect2 autoinhibition [15]. However, the recruitment of this N-terminal fragment of Ect2 is far more efficient in the presence than in the absence of Plk1 activity, suggesting the involvement of additional Plk1 substrates and additional modes of regulation. Indeed, a number of other Plk1 substrates are involved in cytokinesis, including Rock2 [19], Anillin [19], and an additional exchange factor for RhoA, MyoGEF [37]. Further work is required to define the full spectrum of Plk1 substrates required for complete activation of RhoA during cytokinesis.

Our biochemical results, obtained with synchronized cells forced out of mitosis, reveal that Prc1 and a microtubule scaffold are critical for robust generation of phosphorylated HsCdk4. Because Prc1 recruits Plk1, and because Prc1 and HsCdk4 colocalize at the central spindle [20,29,30,32,38,39], it is possible that docking of Plk1 on Prc1 allows the kinase to phosphorylate HsCdk4 while bound to Prc1. While we cannot exclude this possibility, HsCdk4 phosphorylation persisted in cells expressing a Prc1 derivative lacking the previously defined Plk1 docking sites [20]. One important caveat is that these mutations did not completely abrogate Plk1 recruitment to the central spindle. This

diminished Plk1 localization may arise through an alternative pathway, perhaps through association with Mklp1, Mklp2, or HsCdk4 itself (Figure 7B) [19,21,22]. These modes of Plk1 recruitment may provide a sufficient amount of localized kinase activity to generate a biologically relevant pool of phosphorylated HsCdk4. Because these mutations still allow microtubule bundling, Prc1 may create a scaffold of appropriately bundled microtubules on which Plk1 can target HsCdk4 for phosphorylation. In a manner analogous to the phosphorylation of Mklp2 [21], microtubules may also enhance Plk1-mediated phosphorylation of HsCdk4.

While *in vivo* analyses of bipolar cytokinesis events indicate that depletion of either Ect2, RhoA, or HsCdk4, as well as Plk1 inhibition and prevention of HsCdk4 phosphorylation, all result in complete abrogation of cortical contractility [6–14,28], depletion of Prc1 does not cause such a severe phenotype [20,39]. In contrast, our biochemical analyses using prometaphase cells forced out of mitosis indicate that Prc1 is critical for generating significant amounts of phosphorylated HsCdk4. Prc1 depletion in normally dividing cells results in a dramatically disorganized central spindle and a delocalization of cytokinetic factors such as Plk1 and HsCdk4 [20,30,32], rendering an examination into the localization of the phosphorylated form of HsCdk4 equivocal. Additionally, while Prc1 depletion does not block furrowing in bipolar cells, it does greatly attenuate ectopic cleavage furrowing induced by purvalanol A treatment of prometaphase cells. A similar scenario occurs in cells depleted for Mklp1. Whereas its depletion causes a furrowing defect in only 40%–50% of anaphase cells and allows generation of active RhoA [6,8], loss of Mklp1 during forced mitotic exit almost completely abrogates the formation of ectopic cleavage furrows and the recruitment of RhoA to the cortex (unpublished data). Thus, the phenotypes resulting from a reduction in RhoA activation are likely to be context dependent, with the ectopic cleavage furrowing induced by purvalanol A perhaps being particularly dependent on events that occur on bundled microtubules [34,40,41].

In summary, our data reveal that many levels of protein phosphorylation regulate the activation of RhoA upon anaphase onset. The recruitment of critical central spindle components such as Prc1 and centralspindlin, as well as the formation of the HsCdk4–Ect2 complex, are negatively regulated by Cdk1–cyclin B–mediated phosphorylation [6,20,39,42,43]. Following a decline in Cdk1–cyclin B activity at anaphase onset, microtubules are bundled and Plk1 is recruited to the central spindle through association of its PBD with Prc1 [20], Mklp2 [21], and possibly other factors [19,22]. At the central spindle, Plk1 performs several functions critical for cleavage furrow formation, including HsCdk4 phosphorylation and subsequent Ect2 recruitment, as well as activation of RhoA. These multiple layers of regulation conspire to ensure that activation of the cytokinetic machinery occurs at the appropriate time and place.

## Materials and Methods

### Cell Culture and Drug Treatment

Kyoto HeLa S3 cells were grown in Dulbecco's Modified Eagle Medium (DMEM) supplemented with 10% FBS, 2 mM L-glutamine, 100 U penicillin, and 0.1 mg/ml streptomycin. Stable cell lines expressing siRNA-resistant HsCdk4–EGFP and derivatives were constructed in HeLa cells grown in DMEM containing 200 µg/ml hygromycin B. Previously described dsRNAs were used in this study to deplete endogenous HsCdk4 [6], Ect2 [6], and Prc1 [20]. Oligofectamine (Invitrogen) and Lipofectamine-2000 (Invitrogen) were used for transfection of siRNA and plasmid

DNA, respectively. Purvalanol A (Axxora) was used at 22.5  $\mu$ M. Nocodazole (Sigma) was used at 0.04  $\mu$ g/ml to mildly perturb the microtubule cytoskeleton and arrest cells in prometaphase, and at 5  $\mu$ g/ml to fully deplete the microtubule cytoskeleton. BI-2536 (generously provided by Norbert Kraut, Boehringer Ingelheim) was used at 100 nM [23]. MG132 (Sigma) was used at 10  $\mu$ M.

### Live Imaging and Immunofluorescence

To perform live cell imaging analysis, cells were grown in the Delta T4 open dish system (BioOptechs) and controlled at 37°C during the filming process. Cells were visualized using a 40 $\times$ /0.75 NA objective on a Zeiss Axiovert 200M equipped with a Yokogawa CSU-10 spinning-disk unit (McBain), illuminated with a 50 mW 473 nm DPSS laser (Cobolt). Single-plane multipoint acquisitions were captured every 20 s on a Cascade 512B EM-CCD camera (Photometrics) using MetaMorph (Molecular Devices) software. All images were acquired under identical conditions and scaled and processed identically (with the exception of EGFP stable cells, which were acquired using a reduced exposure). Cells were considered to be “positive” for transgene expression if the maximum intensity of cellular fluorescence was >2,000 above the background intensity. For immunofluorescence analysis, cells were grown on coverslips and fixed with methanol at -20°C for either 15 min or overnight (for Anillin, Ect2, GFP, Myc, phospho-Ser170, Plk1, and Prcl staining) or with 10% trichloroacetic acid on ice for 15 min (for RhoA, GFP, HsCdk4, and  $\alpha$ -tubulin staining). Fluorescently conjugated secondary anti-mouse or anti-rabbit (Alexa 488 or 568, Molecular Probes) antibodies were used at 1:500 dilutions. Images were collected with a Zeiss AxioImager M1 microscope using a 40 $\times$ /0.75 objective. All images were acquired under identical conditions using Metamorph (Molecular Devices) software. The 16-bit images were then opened in Image J and scaled to 8-bit with a single scale for all images in a given experiment. For analysis of Ect2 localization to the central spindle, quantification was performed as follows: using raw image data acquired under identical conditions, the fluorescence intensity of Ect2 in a region of interest (ROI) containing the central spindle was quantified. From that value, we subtracted the average of ROIs immediately adjacent to the central spindle. Should the resulting value be  $\geq$ 1,000, then Ect2 central spindle localization was deemed “positive.” A similar scheme was used to determine “positive” Anillin localization to the equatorial cortex. Specifically, using raw image data acquired under identical conditions, the fluorescence intensity of Anillin in a ROI containing the equatorial cortex as well as a ROI in the cytoplasm that was immediately adjacent to the equatorial cortex were quantified. When the ratio of the equatorial ROI to cytoplasmic ROI was greater than 1, then Anillin localization to the equatorial cortex was deemed “positive.”

### Cell Synchronization, Pull-Downs, and Immunoblotting

HeLa cells and stable cell lines were synchronized as described [6,12]. Cells were either released from a nocodazole (prometaphase) block or forced to exit mitosis by addition of purvalanol A (Axxora) for 30 min. For all synchronization experiments involving RNAi, siRNA transfections took place approximately 1 h following release from the first overnight thymidine block so that the duration of RNAi was between 28 and 32 h. Lysates were prepared as described [6]. For the Ect2-BRCT and PBD precipitation experiments, approximately 650  $\mu$ g of total protein was incubated with 10  $\mu$ g of immobilized chitin-binding domain (CBD)-Ect2-BRCT (1–421) and 10  $\mu$ g GST-PBD<sup>+</sup> (construct generously provided by D. Lim and M. Yaffe, Massachusetts

Institute of Technology [MIT]), respectively, for 12–15 h at 4°C with mixing. For immunoprecipitation experiments, approximately 1.5–2 mg of total protein was incubated with either 2  $\mu$ g of anti-Plk1 or anti-Ect2 antibodies for 12–15 h at 4°C with mixing. Protein A-sepharose was added and mixing at 4°C was continued for an additional 45 min. All recombinant beads and immunocomplexes were washed extensively in lysis buffer and boiled in sample buffer prior to separation on SDS-PAGE. The following antibodies were used for Western blot analysis: mouse anti-HsCdk4 (Abnova RacGAP1 1:1,000), mouse anti- $\alpha$ -tubulin (Sigma DM1 $\alpha$  1:10,000), mouse anti-Plk1 (Santa Cruz 1:500), mouse anti-c-Myc (Boehringer Mannheim 9E10 1:5,000), rabbit anti-GFP (Santa Cruz 1:500), rabbit anti-Ect2 ([6] 1:1,000), rabbit anti-Mklp1 ([4] 1:1,000), rabbit anti-Prcl (Santa Cruz 1:500), rabbit anti-cyclin B1 (Santa Cruz 1:500), rabbit anti-phospho-Ser170 (generously provided by P. Jallepalli, MS-KCC, 1:1,000) goat-anti-mouse IR-680 (Invitrogen 1:5,000), and goat-anti-rabbit IR-800 (Jackson Labs 1:5,000). Membranes were imaged using an Odyssey scanner (Li-Cor) and bands quantified using Odyssey v2.1 software (Li-Cor).

### Peptide Array Analysis

One hundred forty-two 18-mer peptides corresponding to HsCdk4 amino acids 1–300 and a positive control Plk1 substrate peptide (SFNDTLDFD) [44] were synthesized and spotted on cellulose membranes. The sequence of each 18-mer peptide is shifted by two residues resulting in a 16 amino acid sequence overlap. Membranes were equilibrated in kinase buffer (50 mM Tris-HCl [pH 7.5], 10 mM MgCl<sub>2</sub>, 1 mM EGTA, and 2 mM DTT) and incubated with 100 nM full-length recombinant Plk1 T210D or Plk1 K82M/T210D in kinase buffer with 1  $\mu$ M ATP and 25  $\mu$ Ci [ $\gamma$ -<sup>32</sup>P] ATP at 30°C for 60 min. Reaction was terminated with 100 mM phosphoric acid, and membranes were washed extensively in 1 M NaCl and 0.5% phosphoric acid. Membranes were soaked into methanol before drying, then exposed to phosphor screen (GE Healthcare). The incorporation of <sup>32</sup>P was analyzed by phosphor imager (Typhoon, GE Healthcare), and spot signal intensities were quantified using ImageQuant (GE Healthcare).

### In Vitro Binding

50 nM of purified recombinant Plk1-T210D 1–306 (generously provided by D. Lim and M. Yaffe, MIT) was used to phosphorylate 100 nM bead-bound CBD tagged HsCdk4-Nt or Ect2-BRCT in kinase buffer (50 mM Tris-HCl [pH 7.5], 10 mM MgCl<sub>2</sub>, 1 mM EGTA, and 2 mM DTT) for 60 min at 30°C with rigorous mixing. Beads were washed extensively in binding buffer (20 mM HEPES [pH 7.2], 150 mM NaCl, 5 mM MgCl<sub>2</sub>, 1 mM DTT, 0.1% Triton X-100), and the appropriate binding partner was added in soluble form at equimolar amounts. Binding reactions were incubated for 90 min at 4°C with mixing. Beads were washed extensively in binding buffer and boiled in sample buffer prior to separation on SDS-PAGE. Bands were visualized either by Coomassie staining or by Western blot analysis.

### Recombinant Protein Expression and Purification

Ect2-BRCT (1–421) and HsCdk4-Nt (1–288) and associated derivatives were fused to the CBD and expressed in BL21 (DE3) RIL cells. Expression was induced by the addition of 0.4 mM IPTG at 25°C for 4–5 h. Bacteria were resuspended in 10 mM HEPES (pH 7.7), 250 mM NaCl, 1 mM EGTA, 1 mM MgCl<sub>2</sub>, 0.1% Triton-X 100, 1 mM DTT, 0.1 mM ATP, 10  $\mu$ g/ml leupeptin/pepstatin, and 1 mM phenylmethylsulfonylfluoride containing 0.5 mg/ml lysozyme prior to sonication. Lysates were

cleared at 18,000 rpm at 4°C for 20 min in a JA.20 Beckman rotor. Prewashed chitin beads (New England Biolabs) were added to the cleared lysates and incubated for 2 h at 4°C with mixing. Following washes, CBD fusions were either maintained on beads, aliquoted, and stored at -80°C, or the fusion tag was removed by addition of recombinant Tobacco Etch Virus (TEV) overnight at 4°C with mixing, and the resulting eluate was stored in aliquots at -80°C.

Mutations Thr210 to Asp and Lys82 to Met were introduced in the cDNA of human Plk1 using site-directed mutagenesis (Quickchange II, Stratagene) to generate full-length activated (kinase active [KA]) Plk1 (T210D) and enzymatically inactive (kinase dead [KD]) Plk1 (K82M/T210D). The resulting Plk1 variants were cloned into pFastBac1 (Invitrogen) containing GST and a PreScission protease recognition sequence upstream of the cloning site. GST-Plk1 T210D and GST-Plk1 K82M/T210D were expressed in Sf-9 cells using the baculovirus system. Infected cells were incubated for 72 h, treated with 0.1 μM okadaic acid for 2 h, and then harvested. Cells were resuspended in buffer A (50 mM HEPES [pH 7.5], 150 mM NaCl, 1 mM EDTA, 2.5 mM EGTA, 0.1% NP-40, 10% glycerol, 1 mM DTT, 1 μM microcystin LR, and protease inhibitor cocktail [Roche]). After incubation in buffer A for 30 min at 4°C, cells were lysed by sonication. Lysates were centrifuged at 28,000g for 30 min at 4°C. GST fusion proteins purified using glutathione sepharose 4B (GE Healthcare). GST-Plk1 proteins were eluted in buffer containing 20 mM glutathione and subsequently incubated with PreScission protease (GE Healthcare) for 3 h at 4°C. Following cleavage, the reaction mixture was dialyzed three times against buffer C (50 mM Tris-HCl [pH 7.5], 150 mM NaCl, 1 mM EDTA, 10% glycerol, and 1 mM DTT). To remove GST and PreScission protease, the dialyzed fraction was incubated with glutathione sepharose 4B. The flow-through containing Plk1 was frozen in liquid nitrogen and stored at -80°C. Amount, purity, and activity of Plk1 T210D and Plk1 K82M/T210D were determined by SDS-PAGE, Coomassie brilliant blue staining, and in vitro kinase assays using casein as a model substrate (unpublished data).

### Plk1 Kinase Reactions

For labeled kinase reactions, GST and a series of HsCdk4 fragments fused to the C terminus of GST were expressed in *E. coli* and purified using glutathione sepharose 4B (GE Healthcare). Immobilized GST or GST-HsCdk4 protein was incubated with full-length recombinant Plk1 T210D or Plk1 K82M/T210D in kinase buffer with 50 μM ATP and 1 μCi [ $\gamma$ -<sup>32</sup>P] ATP at 30°C for 30 min. Beads were washed in PBS containing 1% Triton X-100 and boiled in SDS sample buffer. Samples were resolved by SDS-PAGE, visualized by Coomassie brilliant blue staining, and finally analyzed using a phosphor imager (typhoon, GE Healthcare).

### Yeast Two Hybrid Analysis

*S. cerevisiae* strain PJ69-4A (generously provided by K. Gould, Vanderbilt) was cotransformed by lithium acetate method with bait (pGBT9, Trp<sup>+</sup>) and prey (pGAD424, Leu<sup>+</sup>) plasmids according to standard techniques [45]. Leu<sup>+</sup>/Trp<sup>+</sup> transformants were scored for positive interactions by serial dilution on synthetic dextrose medium lacking adenine and histidine.

### Supporting Information

**Figure S1 Plk1 phosphorylates the N terminus of HsCdk4 to simulate association with Ect2-BRCT.** (A) Schematic of experimental design (upper diagram; same as Figure 2A). Recombinant HsCdk4-Nt or Ect2-BRCT fused to

CBD was incubated in the presence (+) or absence (-) of Plk1-T210 kinase domain and ATP. Soluble HsCdk4-Nt or Ect2-BRCT was added to the washed beads, mixed, and then separated on SDS-PAGE and probed with antibodies to Ect2 and HsCdk4 (lower gels). Input represents 50% of the total soluble protein incubated with immobilized protein. (B) Recombinant HsCdk4-Nt and indicated derivatives fused to CBD were assayed for Plk1 phosphorylation and Ect2-BRCT binding as in (A). Proteins were resolved on SDS-PAGE and Coomassie stained for visualization. Input represents 50% of the total soluble protein incubated with immobilized protein.

Found at: doi:10.1371/journal.pbio.1000110.s001 (2.87 MB EPS)

**Figure S2 Plk1 phosphorylates N-terminal peptides of HsCdk4 on four serine residues.** (A) Synthesized 18-mer peptides, corresponding to HsCdk4 1-300, and control peptide were spotted on cellulose membranes. Membranes were incubated with full-length recombinant Plk1 T210D (upper panel) or Plk1 K82M/T210D (middle panel) and [ $\gamma$ -<sup>32</sup>P] ATP. Incorporation of <sup>32</sup>P was visualized by autoradiography. (B) Immobilized GST, GST-HsCdk4 (111-188), and GST-HsCdk4 4A (111-188) were incubated with recombinant Plk1 T210D (KA) or Plk1 K82M/T210D (KD) and [ $\gamma$ -<sup>32</sup>P] ATP. Proteins were separated by SDS-PAGE and visualized by Coomassie brilliant blue staining. Incorporation of <sup>32</sup>P was analyzed by autoradiography. Relative incorporation of <sup>32</sup>P to GST-HsCdk4 was quantified and is shown below the corresponding lanes.

Found at: doi:10.1371/journal.pbio.1000110.s002 (6.79 MB EPS)

**Figure S3 Association of HsCdk4-Nt and Ect2-BRCT in yeast.** Strain KGY 1296 was cotransformed with the indicated bait (pGBT9) and prey (pGAD424) plasmids and selected on media lacking Trp and Leu. Cotransformed cells were serially diluted (1:10) onto either +His +Ade medium (growth does not require reporter activation) or -His -Ade (growth requires reporter activation). EV, empty vector control.

Found at: doi:10.1371/journal.pbio.1000110.s003 (3.43 MB EPS)

**Figure S4 Characterization of cell lines stably expressing HsCdk4-EGFP derivatives.** (A) The indicated stable cell lines transfected with siRNA to deplete endogenous HsCdk4 were synchronized in anaphase using a MG132 arrest/release protocol. Cells were fixed and stained with GFP antibodies and 4',6-diamidino-2-phenylindole (DAPI), and scored for percentage of anaphase cells possessing HsCdk4-EGFP at the central spindle ( $n = 100$ ). (B) The indicated stable cell lines were transfected with siRNA to deplete endogenous HsCdk4 and synchronized in anaphase using a MG132 arrest/release protocol. Cells were fixed and stained with antibodies to GFP and Pre1, and DNA was stained with DAPI. (C) The indicated stable cell lines were either mock transfected (control) or transfected with siRNA to deplete endogenous HsCdk4 and synchronized in anaphase using a MG132 arrest/release protocol. Cells were fixed and stained with antibodies to GFP and phospho-Ser170, and DNA was stained with DAPI. (D) Relative amounts of endogenous HsCdk4 levels were determined in mock-transfected cells (control) and in cells transfected with siRNA to deplete endogenous HsCdk4 for between 28 and 32 h. Lysates were prepared, separated on SDS-PAGE, and probed with antibodies to HsCdk4 and  $\alpha$ -tubulin as a loading control. Quantification of band intensities was performed using Odyssey v2.1 software. Standard deviation was generated from at least four independent experiments.

Found at: doi:10.1371/journal.pbio.1000110.s004 (7.04 MB EPS)

**Figure S5 Transiently transfected HsCdk4-4A-EGFP fails to promote cleavage furrow formation and**

**Ect2-BRCT association.** (A) HeLa cells cotransfected with the indicated HsCyk-4-EGFP fusions and siRNAs to deplete endogenous HsCyk-4 were filmed by live video microscopy and scored for cytokinesis failure as in Figure 3C. The total number of transfected cells scored for each cell line: EGFP,  $n = 13$ ; wt,  $n = 12$ ; 4A,  $n = 17$ ; 4D,  $n = 12$ . (B) HeLa cells cotransfected with the indicated HsCyk-4-EGFP fusions and siRNAs to deplete endogenous HsCyk-4 were synchronized in prometaphase with nocodazole and released by addition of 22.5  $\mu\text{M}$  purvalanol A. Lysates were prepared, precipitated with recombinant Ect2-BRCT, washed and separated on SDS-PAGE, and probed with antibodies to HsCyk-4 and  $\alpha$ -tubulin. Lysates represent approximately 5% of input.

Found at: doi:10.1371/journal.pbio.1000110.s005 (1.69 MB EPS)

**Figure S6 Determination of Ect2 and Anillin failure to localize to the central spindle and equatorial cortex, respectively, in HsCyk-4-EGFP-expressing cells.** (A)

The indicated stable HeLa cell lines expressing HsCyk-4-EGFP were transfected with siRNAs to deplete endogenous HsCyk-4 and synchronized in anaphase using a MG132 arrest/release protocol. Cells were fixed and stained with Ect2 and GFP antibodies, and DNA was visualized using DAPI. Positive central spindle accumulation of Ect2 was determined as indicated in Materials and Methods. (B) A subset of the cells analyzed in Figure 4A were selected for quantification, and the intensity of Ect2 at the central spindle (quantified as above) was plotted relative to HsCyk-4-EGFP levels for the indicated stable cell lines depleted for endogenous HsCyk-4. The area above the dashed line represents those cells possessing “positive” Ect2 central spindle localization; below the dashed line represents “failed” central spindle localization. (C) The indicated stable cell lines transfected with siRNA to deplete endogenous HsCyk-4 were synchronized in anaphase using a MG132 arrest/release protocol. Cells were fixed and stained with antibodies to GFP and Anillin, and DNA was stained with DAPI. Percentage of cells with positive Anillin localization (see Materials and Methods section for assessment of “positive”) to the equatorial cortex was determined in at least 100 cells. (D) A subset of the cells analyzed in Figure S6C were chosen for quantification, and the ratio of fluorescence intensity values of Anillin at the equatorial cortex: Anillin in the cytoplasm (quantified as above) was plotted relative to HsCyk-4-EGFP levels for the indicated stable cell lines depleted for endogenous HsCyk-4. The area above the dashed line represents those cells possessing “positive” Anillin localization to the equatorial cortex; below the dashed line represents “failed” cortical localization.

Found at: doi:10.1371/journal.pbio.1000110.s006 (6.26 MB EPS)

## References

- Piekny A, Werner M, Glotzer M (2005) Cytokinesis: welcome to the Rho zone. *Trends Cell Biol* 15: 651–658.
- D’Avino PP, Savoian MS, Glover DM (2005) Cleavage furrow formation and ingression during animal cytokinesis: a microtubule legacy. *J Cell Sci* 118: 1549–1558.
- Glotzer M (2001) Animal cell cytokinesis. *Annu Rev Cell Dev Biol* 17: 351–386.
- Mishima M, Kaitna S, Glotzer M (2002) Central spindle assembly and cytokinesis require a kinesin-like protein/RhoGAP complex with microtubule bundling activity. *Dev Cell* 2: 41–54.
- Pavlic-Kaltenbrunner V, Mishima M, Glotzer M (2007) Cooperative assembly of CYK-4/MgcRacGAP and ZEN-4/MKLP1 to form the centralspindlin complex. *Mol Biol Cell* 18: 4992–5003.
- Yuce O, Piekny A, Glotzer M (2005) An ECT2-centralspindlin complex regulates the localization and function of RhoA. *J Cell Biol* 170: 571–582.
- Zhao WM, Fang G (2005) MgcRacGAP controls the assembly of the contractile ring and the initiation of cytokinesis. *Proc Natl Acad Sci U S A* 102: 13158–13163.
- Kamijo K, Ohara N, Abe M, Uchimura T, Hosoya H, et al. (2006) Dissecting the role of Rho-mediated signaling in contractile ring formation. *Mol Biol Cell* 17: 43–55.
- Nishimura Y, Yonemura S (2006) Centralspindlin regulates ECT2 and RhoA accumulation at the equatorial cortex during cytokinesis. *J Cell Sci* 119: 104–114.
- Kim JE, Billadeau DD, Chen J (2005) The tandem BRCT domains of Ect2 are required for both negative and positive regulation of Ect2 in cytokinesis. *J Biol Chem* 280: 5733–5739.
- Burkard ME, Randall CL, Larochelle S, Zhang C, Shokat KM, et al. (2007) Chemical genetics reveals the requirement for Polo-like kinase 1 activity in positioning RhoA and triggering cytokinesis in human cells. *Proc Natl Acad Sci U S A* 104: 4383–4388.
- Petronczki M, Glotzer M, Kraut N, Peters JM (2007) Polo-like kinase 1 triggers the initiation of cytokinesis in human cells by promoting recruitment of the RhoGEF Ect2 to the central spindle. *Dev Cell* 12: 713–725.
- Brennan IM, Peters U, Kapoor TM, Straight AF (2007) Polo-like kinase controls vertebrate spindle elongation and cytokinesis. *PLoS ONE* 2: e409. doi:10.1371/journal.pone.0000409.
- Santamaria A, Neef R, Eberspacher U, Eis K, Husemann M, et al. (2007) Use of the novel Plk1 inhibitor ZK-thiazolidinone to elucidate functions of Plk1 in early and late stages of mitosis. *Mol Biol Cell* 18: 4024–4036.

**Figure S7 Plk1 associates with Prc1, but not HsCyk-4, during forced mitotic exit.** (A)

HeLa cells synchronized with nocodazole were treated with DMSO or 22.5  $\mu\text{M}$  purvalanol A in the presence or absence of 100 nM BI-2536. Lysates and Plk1 immunoprecipitates were separated on SDS-PAGE and probed with Plk1, Prc1, Ect2, and HsCyk-4 antibodies. (B) HeLa cells synchronized with nocodazole were treated with either DMSO, 22.5  $\mu\text{M}$  purvalanol A, or 100 nM BI-2536. Lysates and PBD-bound (PBD<sup>+</sup>) fractions were separated on SDS-PAGE and probed with Ect2, Prc1, and HsCyk-4 antibodies (upper panels). Lysate represents approximately 5% of input. The ratio of PBD bound HsCyk-4, Ect2, and Prc1 in purvalanol A or BI-2536 treated cells over nocodazole control were plotted (lower panel).

Found at: doi:10.1371/journal.pbio.1000110.s007 (4.58 MB EPS)

**Figure S8 HsCyk-4 remains phosphorylated on Ser-170 in cells expressing Prc1-ST601/2AA.** (A)

HeLa cells cotransfected with siRNA to deplete endogenous Prc1 and CMV-Myc-Prc1-wt (wt) or CMV-Myc-Prc1-ST601/2AA (AA) were synchronized in anaphase using an MG132 arrest/release protocol. Cells were fixed and stained with antibodies to Myc and Plk1, and DNA was stained with DAPI. (B) HeLa cells cotransfected with siRNA to deplete endogenous Prc1 and the indicated CMV-Myc-Prc1 constructs were arrested in prometaphase with nocodazole. Cells were released with addition of 22.5  $\mu\text{M}$  purvalanol A for 30 min. Lysates were prepared, immunoprecipitated using Plk1 antibodies, washed, and separated on SDS-PAGE. Blots were probed with antibodies to Myc and Plk1. Asterisks indicate the position of cross-reacting species recognized by Myc antibodies. Lysate represents approximately 5% of the input. (C) HeLa cells transfected and synchronized as in (A) were fixed and stained with antibodies to Myc and phospho-170, and DNA was stained with DAPI.

Found at: doi:10.1371/journal.pbio.1000110.s008 (8.42 MB EPS)

## Acknowledgments

The authors would like to thank D. Lim (MIT), M. Yaffe (MIT), Norbert Kraut (Boehringer-Ingelheim), and K. Gould (Vanderbilt) for reagents; and P. Jallepalli (Memorial Sloan-Kettering Cancer Center) for sharing unpublished information and generously providing HsCyk-4 phosphospecific antibodies (see accompanying Research Article).

## Author Contributions

The author(s) have made the following declarations about their contributions: Conceived and designed the experiments: BAW TT MP MG. Performed the experiments: BAW TT MP. Analyzed the data: BAW TT MP MG. Wrote the paper: BAW MP MG.

15. Niiya F, Tatsumoto T, Lee KS, Miki T (2006) Phosphorylation of the cytokinesis regulator ECT2 at G2/M phase stimulates association of the mitotic kinase Plk1 and accumulation of GTP-bound RhoA. *Oncogene* 25: 827–837.
16. Lowery DM, Mohammad DH, Elia AE, Yaffe MB (2004) The Polo-box domain: a molecular integrator of mitotic kinase cascades and Polo-like kinase function. *Cell Cycle* 3: 128–131.
17. Elia AE, Cantley LC, Yaffe MB (2003) Proteomic screen finds pSer/pThr-binding domain localizing Plk1 to mitotic substrates. *Science* 299: 1228–1231.
18. Elia AE, Rellos P, Haire LF, Chao JW, Ivins FJ, et al. (2003) The molecular basis for phosphodependent substrate targeting and regulation of Plks by the Polo-box domain. *Cell* 115: 83–95.
19. Lowery DM, Clauser KR, Hjerrild M, Lim D, Alexander J, et al. (2007) Proteomic screen defines the Polo-box domain interactome and identifies Rock2 as a Plk1 substrate. *EMBO J* 26: 2262–2273.
20. Neef R, Gruneberg U, Kopajtich R, Li X, Nigg EA, et al. (2007) Choice of Plk1 docking partners during mitosis and cytokinesis is controlled by the activation state of Cdk1. *Nat Cell Biol* 9: 436–444.
21. Neef R, Preisinger C, Sutcliffe J, Kopajtich R, Nigg EA, et al. (2003) Phosphorylation of mitotic kinesin-like protein 2 by polo-like kinase 1 is required for cytokinesis. *J Cell Biol* 162: 863–875.
22. Liu X, Zhou T, Kuriyama R, Erikson RL (2004) Molecular interactions of Polo-like-kinase 1 with the mitotic kinesin-like protein CHO1/MKLP-1. *J Cell Sci* 117: 3233–3246.
23. Steegmaier M, Hoffmann M, Baum A, Lenart P, Petronczki M, et al. (2007) BI 2536, a potent and selective inhibitor of polo-like kinase 1, inhibits tumor growth in vivo. *Curr Biol* 17: 316–322.
24. Niiya F, Xie X, Lee KS, Inoue H, Miki T (2005) Inhibition of cyclin-dependent kinase 1 induces cytokinesis without chromosome segregation in an ECT2 and MgcRacGAP-dependent manner. *J Biol Chem* 280: 36502–36509.
25. Lee MS, Edwards RA, Thede GL, Glover JN (2005) Structure of the BRCT repeat domain of MDC1 and its specificity for the free COOH-terminal end of the gamma-H2AX histone tail. *J Biol Chem* 280: 32053–32056.
26. Lowery DM, Lim D, Yaffe MB (2005) Structure and function of Polo-like kinases. *Oncogene* 24: 248–259.
27. Nousiainen M, Sillje HH, Sauer G, Nigg EA, Korner R (2006) Phosphoproteomic analysis of the human mitotic spindle. *Proc Natl Acad Sci U S A* 103: 5391–5396.
28. Piekny AJ, Glotzer M (2008) Anillin is a scaffold protein that links RhoA, actin, and myosin during cytokinesis. *Curr Biol* 18: 30–36.
29. Ban R, Irino Y, Fukami K, Tanaka H (2004) Human mitotic spindle-associated protein PRC1 inhibits MgcRacGAP activity toward Cdc42 during the metaphase. *J Biol Chem* 279: 16394–16402.
30. Kurasawa Y, Earnshaw WC, Mochizuki Y, Dohmac N, Todokoro K (2004) Essential roles of KIF4 and its binding partner PRC1 in organized central spindle midzone formation. *EMBO J* 23: 3237–3248.
31. Gruneberg U, Neef R, Li X, Chan EH, Chalamalasetty RB, et al. (2006) KIF14 and citron kinase act together to promote efficient cytokinesis. *J Cell Biol* 172: 363–372.
32. Mollinari C, Kleman JP, Saoudi Y, Jablonski SA, Perard J, et al. (2005) Ablation of PRC1 by small interfering RNA demonstrates that cytokinetic abscission requires a central spindle bundle in mammalian cells, whereas completion of furrowing does not. *Mol Biol Cell* 16: 1043–1055.
33. Canman JC, Hoffman DB, Salmon ED (2000) The role of pre- and post-anaphase microtubules in the cytokinesis phase of the cell cycle. *Curr Biol* 10: 611–614.
34. Hu CK, Coughlin M, Field CM, Mitchison TJ (2008) Cell polarization during monopolar cytokinesis. *J Cell Biol* 181: 195–202.
35. Glotzer M (2005) The molecular requirements for cytokinesis. *Science* 307: 1735–1739.
36. Glover JN, Williams RS, Lee MS (2004) Interactions between BRCT repeats and phosphoproteins: tangled up in two. *Trends Biochem Sci* 29: 579–585.
37. Asiedu M, Wu D, Matsumura F, Wei Q (2008) Phosphorylation of MyoGEF on Thr-574 by Plk1 promotes MyoGEF localization to the central spindle. *J Biol Chem* 283: 28392–28400.
38. Jiang W, Jimenez G, Wells NJ, Hope TJ, Wahl GM, et al. (1998) PRC1: a human mitotic spindle-associated CDK substrate protein required for cytokinesis. *Mol Cell* 2: 877–885.
39. Mollinari C, Kleman JP, Jiang W, Schoehn G, Hunter T, et al. (2002) PRC1 is a microtubule binding and bundling protein essential to maintain the mitotic spindle midzone. *J Cell Biol* 157: 1175–1186.
40. Werner M, Munro E, Glotzer M (2007) Astral signals spatially bias cortical myosin recruitment to break symmetry and promote cytokinesis. *Curr Biol* 17: 1286–1297.
41. Murthy K, Wadsworth P (2008) Dual role for microtubules in regulating cortical contractility during cytokinesis. *J Cell Sci* 121: 2350–2359.
42. Mishima M, Pavicic V, Gruneberg U, Nigg EA, Glotzer M (2004) Cell cycle regulation of central spindle assembly. *Nature* 430: 908–913.
43. Zhu C, Lau E, Schwarzenbacher R, Bossy-Wetzel E, Jiang W (2006) Spatiotemporal control of spindle midzone formation by PRC1 in human cells. *Proc Natl Acad Sci U S A* 103: 6196–6201.
44. Lansing TJ, McConnell RT, Duckett DR, Spehar GM, Knick VB, et al. (2007) In vitro biological activity of a novel small-molecule inhibitor of polo-like kinase 1. *Mol Cancer Ther* 6: 450–459.
45. Keeney JB, Boeke JD (1994) Efficient targeted integration at *leu1-32* and *ura4-294* in *Schizosaccharomyces pombe*. *Genetics* 136: 849–856.
